# Supplementary material
Source: PubMed Central journal article supplement (PMC4511052)
Supplement: 10.3163.1536-5050.103.3.005.sg002.pdf [file 10.3163.1536-5050.103.3.005.sg002.pdf]

## Starting the data conversation: informing data services at an academic health sciences library

Kevin B. Read MLIS, MAS; Alisa Surkis, PhD, MLS; Catherine Larson, MS; Aileen McCrillis, MS, MPH, AHIP; Alice Graff; Joey Nicholson, MLIS, MPH; Juanchan Xu, MD, MS

### APPENDIX B

#### Theme codes and definitions

| Code                            | Definition                                                                                                                   |
|---------------------------------|------------------------------------------------------------------------------------------------------------------------------|
| Research area                   | When interviewees discuss their research                                                                                     |
| Data type                       | When interviewees discuss the different types of data they work with                                                         |
| Perception of data usefulness   | When interviewees discuss their perceptions of the usefulness of their data                                                  |
| Data collection tool            | When interviewees mention a data collection tool that they use (e.g. software, program, tool)                                |
| Data collection                 | When interviewees discuss the process of data collection                                                                     |
| Data format                     | When interviewee mention particular formats the data are saved in                                                            |
| Data size                       | When interviewees discuss the size of their data                                                                             |
| Data organization               | When interviewees discuss how they organize their data                                                                       |
| Data organization: opinion +    | When interviewees provide a positive opinion on the organization of their data                                               |
| Data organization: opinion (-)  | When interviewees provide a negative opinion of the organization of their data                                               |
| Data management responsibility  | When interviewees discuss who is responsible for the management of data                                                      |
| Data storage                    | When interviewees discuss where their data are stored                                                                        |
| Data storage: opinion +         | When the interviewees provide a positive opinion concerning the storage of their data                                        |
| Data storage: opinion (-)       | When the interviewees provide a negative opinion concerning the storage of their data                                        |
| Data management cost allocation | When interviewees discuss if they allocate costs for data management in their funded research                                |
| Data reuse                      | When interviewees discuss the reuse of their data                                                                            |
| Data sharing                    | When interviewees discuss the sharing of their data                                                                          |
| Data sharing: opinion +         | When interviewees provide a positive opinion about sharing data                                                              |
| Data sharing: opinion (-)       | When interviewees provide a negative opinion about sharing data                                                              |
| Data preservation               | When interviewees discuss the preservation of their data (e.g., how long they want to store data for)                        |
| Data preservation: opinion +    | When interviewees provide a positive opinion about the preservation of their data                                            |
| Data preservation: opinion (-)  | When interviewees provide a negative opinion about the preservation of their data                                            |
| Current data services           | When interviewees discuss whether or not they use current data services                                                      |
| Desired data services           | When interviewees discuss what data services they believe would be beneficial to them                                        |
| Data catalog—opinion +          | When interviewees discuss the data catalog in a positive way—National Institutes of Health (NIH) or institutional in any way |
| Data catalog—opinion (-)        | When interviewees discuss the data catalog in a negative way—NIH or institutional in any way                                 |
