# Supplementary material
Source: PubMed Central journal article supplement (PMC4511052)
Supplement: 10.3163.1536-5050.103.3.005.sg003.pdf [file 10.3163.1536-5050.103.3.005.sg003.pdf]

## Starting the data conversation: informing data services at an academic health sciences library

Kevin B. Read MLIS, MAS; Alisa Surkis, PhD, MLS; Catherine Larson, MS; Aileen McCrillis, MS, MPH, AHIP; Alice Graff; Joey Nicholson, MLIS, MPH; Juanchan Xu, MD, MS

### APPENDIX C

#### Interview results

|          |                       |                                                                                                                                                                                                                                           |
|----------|-----------------------|-------------------------------------------------------------------------------------------------------------------------------------------------------------------------------------------------------------------------------------------|
| Basic    | Current data services | We use the servers and stuff                                                                                                                                                                                                              |
| Basic    | Current data services | Verizon building—computational department, we work with their high performance computing cluster for our genomics data                                                                                                                    |
| Basic    | Current data services | Method for large file exchange that was introduced 5 years ago—use that                                                                                                                                                                   |
| Basic    | Current data services | Skirball IT, they provided external hard-drives and have an automated backup service, but when I got here, I was the second PC lab. They were Mac based, so I don't know if it [the PC computers] has been backed up on Skirball IT.      |
| Basic    | Current data services | I like the offsite server, that's really nice, I back my laptop up to that, I've been able to pull files off when stuff happens with my computer and I've had no problems, it's been great                                                |
| Basic    | Current data services | "I've been pleased with IT and the Library getting all these journals on line, that's been a major win"                                                                                                                                   |
| Basic    | Current data services | Pretty much everything, everything I can                                                                                                                                                                                                  |
| Basic    | Current data services | Uses Biostats Core—is on a number of my papers                                                                                                                                                                                            |
| Basic    | Current data services | Supports half and FTE in her group—that's all grant money                                                                                                                                                                                 |
| Basic    | Current data services | Uses X for all medical statistical analyses                                                                                                                                                                                               |
| Clinical | Current data services | Uses a data manager—research IT for storage                                                                                                                                                                                               |
| Clinical | Current data services | Statistician—primary appointment biostats, but she's dedicated to cardiology                                                                                                                                                              |
| Clinical | Current data services | We do have a shared drive—but we realized it's too small, just had a couple of databases and that's it                                                                                                                                    |
| Clinical | Current data services | Nope—no REDCap or Velos, have been exposed to but they wouldn't use, she doesn't know everything about it but someone in lab used it for collaboration and said it was a nightmare, although that person was not so computer comfortable. |
| Clinical | Current data services | He has his data managers                                                                                                                                                                                                                  |
| Clinical | Current data services | CTSI helped with REDCap—helped with training                                                                                                                                                                                              |
| Clinical | Current data services | She doesn't use any type of data support system. The data managers do have a system, but she's not aware of what it is.                                                                                                                   |

|                     |                           |                                                                                                                                                                                                                                        |
|---------------------|---------------------------|----------------------------------------------------------------------------------------------------------------------------------------------------------------------------------------------------------------------------------------|
| Clinical            | Current data services     | Internally, Damon set up everything on a server. Nothing's stored on our computers, so he's got an internal server arrangement.                                                                                                        |
| Clinical            | Current data services     | We work with Rachel Brody and she's very good in terms of the data analysis for the bio repository samples—she's superb, really good at facilitating that                                                                              |
| Clinical            | Current data services     | Running the data, organizing it, and getting it back to us                                                                                                                                                                             |
| Clinical/Pop Health | Current data services     | Used legal council before for all HMO agreements                                                                                                                                                                                       |
| Clinical/Pop Health | Current data services     | Then moved to research IT so research IT signs as data custodian                                                                                                                                                                       |
| Clinical/Pop Health | Current data services     | Haven't used any support                                                                                                                                                                                                               |
| Clinical/Pop Health | Current data services     | Coordinator created the REDCap—used some support through help desk                                                                                                                                                                     |
| Clinical/Pop Health | Current data services     | Use shared drive                                                                                                                                                                                                                       |
| Clinical/Pop Health | Current data services     | "I use REDCap for a survey" (Courtney)                                                                                                                                                                                                 |
| Basic               | Data catalog: opinion (-) | Scares me the most is an unguarded repository of data where creepy people can get their hands on the data                                                                                                                              |
| Clinical            | Data catalog: opinion (-) | I have no idea                                                                                                                                                                                                                         |
| Med Ed?             | Data catalog: opinion (-) | Researchers and faculty are notorious of being difficult to get to do what we're supposed to do, so what's the incentive—has to be built in or no one's going to do it                                                                 |
| Med Ed?             | Data catalog: opinion (-) | Difficulty with meta tagging will be dealing with all the different kinds of research                                                                                                                                                  |
| Med Ed?             | Data catalog: opinion (-) | Med education and survey and pop health research tough to keep in                                                                                                                                                                      |
| Basic               | Data catalog: opinion +   | NIH would have to decide how much they want to know for the raw data.                                                                                                                                                                  |
| Basic               | Data catalog: opinion +   | Need to figure out how to communicate it—like informed consent needs to be written at a 6th grade level, that's probably what we're going to have to do. Most people don't have any concept about what storage architectures are       |
| Basic               | Data catalog: opinion +   | Radiation oncology—money is all made in the simulations—that's real computational                                                                                                                                                      |
| Basic               | Data catalog: opinion +   | Senior physicist—probably want to contact him—responsible for all their computational designs. They would want to catalog their data—I would imagine it would be hugely cost effective if they had a database to draw on for all these |
| Basic               | Data catalog: opinion +   | Radiology also has huge data needs, and retrieval is their issue—they've had the money to do their own cataloging—use technical fees                                                                                                   |

|                     |                         |                                                                                                                                                                                                                                                                                                                                                                                                                                                                                                                                                                                                                                  |
|---------------------|-------------------------|----------------------------------------------------------------------------------------------------------------------------------------------------------------------------------------------------------------------------------------------------------------------------------------------------------------------------------------------------------------------------------------------------------------------------------------------------------------------------------------------------------------------------------------------------------------------------------------------------------------------------------|
| Basic               | Data catalog: opinion + | I think that would be really useful, because when I'm relying on people in my lab, I don't worry about it, but I've had instances, like this summer, I have students come and go, so they aren't deeply engaged in the project, and they send me the data from the mass spec, so I don't know what to do with the data, and have to ask, what do these columns mean? I don't have a permanent resource to get advice and help in interpreting.                                                                                                                                                                                   |
| Basic               | Data catalog: opinion + | Would want to limit access to her lab                                                                                                                                                                                                                                                                                                                                                                                                                                                                                                                                                                                            |
| Clinical            | Data catalog: opinion + | Think out the workflow, cuz I'm not going to want to spend my time searching for data when someone asks for it—would need mechanism to field these requests, do the extractions                                                                                                                                                                                                                                                                                                                                                                                                                                                  |
| Clinical            | Data catalog: opinion + | Also having a way to access these big public datasets—we're all separately paying for access to these datasets, and it's the same exact dataset                                                                                                                                                                                                                                                                                                                                                                                                                                                                                  |
| Clinical            | Data catalog: opinion + | It would be interesting if there were some centralized thing. People collect data regarding smoking stating, cancer studies, cardiovascular studies, even electronic cigarettes, and tobacco research, it would be kinda cool if I could with a button, "I wonder who at NYU has data about prevalence of e-cigarette use?" How many cigarettes a day? Who's using smoking cessation? Mental illness and smoking? So let's say people are studying schizophrenia and they are asking do you smoke? Someone like me I could say, "huh, so it happens that of these patients who have these three comorbidities are being treated" |
| Clinical            | Data catalog: opinion + | If there was some sort of way to pull the data [it would be useful]                                                                                                                                                                                                                                                                                                                                                                                                                                                                                                                                                              |
| Clinical/Pop Health | Data catalog: opinion + | Thinks it's a good idea                                                                                                                                                                                                                                                                                                                                                                                                                                                                                                                                                                                                          |
| Clinical/Pop Health | Data catalog: opinion + | If someone's writing a grant about smoking, all they need from me is 2 numbers, I'm never going to do a smoking study, so I'd be happy to have them use it, I would want to be contacted but I would want it discoverable                                                                                                                                                                                                                                                                                                                                                                                                        |
| Statistics          | Data catalog: opinion + | "I think everyone should...it would depend again on how much people are willing to share data. I still notice the tendency of researchers to say, we'll put it on the public website, but we'll put it in some way so that it won't be usable." "Yeah its publicly available! U can go on the site! But everything is hidden somewhere, their contact, what everything means, etc., so a lot of work needs to be done in this regard"                                                                                                                                                                                            |
| Statistics          | Data catalog: opinion + | "I suggest the requirement for sharing comes from the higher ups, that you do research in this institution, you need to share your data"                                                                                                                                                                                                                                                                                                                                                                                                                                                                                         |
| Basic               | Data catalog: opinion + | It's conceivable now that basically u could have links to lots of information that could be related to the publication, make it a lot more valuable—allow people to reproduce things, but also maybe test an idea that they have                                                                                                                                                                                                                                                                                                                                                                                                 |
| Basic               | Data catalog: opinion + | If they can see the full distribution, not just a bar [graph or] plot. The theorists want this, they want the numbers. The data are packed into the paper and hyperlinked away.                                                                                                                                                                                                                                                                                                                                                                                                                                                  |

|          |                         |                                                                                                                                                                                                        |
|----------|-------------------------|--------------------------------------------------------------------------------------------------------------------------------------------------------------------------------------------------------|
| Clinical | Data catalog: opinion + | "I think more important than the data itself is the tools—a repository of the surveys, the tools they used, whether it's what they made themselves or is publically available"                         |
| Clinical | Data catalog: opinion + | All of work has cross-disease implications. Really rich to have access to data sets that others are using.                                                                                             |
| Med Ed?  | Data catalog: opinion + | Data catalog could help—We could find some colleagues who have questions they want to answer                                                                                                           |
| Med Ed?  | Data catalog: opinion + | Generally you want to collaborate with people, not just give them your dataset to do with it what you want                                                                                             |
| Med Ed?  | Data catalog: opinion + | There's one thing to have a list, but to actually make it useful, need mechanism to query it and have a way to connect                                                                                 |
| Med Ed?  | Data catalog: opinion + | Collaboration button "someone is interested in your research!"                                                                                                                                         |
| Med Ed?  | Data catalog: opinion + | How with this data catalog we updated—how often update and get data refreshed?                                                                                                                         |
| Med Ed?  | Data catalog: opinion + | Have to think about flexibility with categorizing data                                                                                                                                                 |
| Basic    | Data collection         | The software we use is available on the Internet, but it had a flaw. So my son wrote a shell to fix the software on the Internet                                                                       |
| Basic    | Data collection         | For florescence from a microtiter plate, that's the company that made the instrument using their proprietary software.                                                                                 |
| Basic    | Data collection         | Sequence data, we use software that we bought and use in the lab—it may not be the most up-to-date—but there's probably free software out there.                                                       |
| Basic    | Data collection         | Least squares software that I wrote that was perfect for what we needed to do, that just produced numbers                                                                                              |
| Basic    | Data collection         | Collection of the data is done on an instrument with its own software—it comes from the company that sold you the instrument.                                                                          |
| Basic    | Data collection         | Have to compress it somewhere—start to analyze the data—simplify it                                                                                                                                    |
| Basic    | Data collection         | 20-fold compression—that's what were generally working with—easy to move back and forth from the server                                                                                                |
| Basic    | Data collection         | Raw data, particular on the microscopy side, are enormous files, take a lot of processing by custom built software.                                                                                    |
| Basic    | Data collection         | Files that have been analyzed—from one image, they acquire 2,000 frames; in each frame, there are about 200 florescent point                                                                           |
| Basic    | Data collection         | He will go into raw data if he has to, if there's a question, something looks weird, he may go in and dig into more detail, but other than that, he usually he doesn't go into the raw data            |
| Basic    | Data collection         | Occasionally they will crosscheck—have files sent to 2 different people, have 2 different people measure, and then compare—there is some subjectivity, but not a lot                                   |
| Basic    | Data collection         | Deal with info at the level of genes and different expression levels and multiple cell types and then a lot of this image data, which will correlate with some of the cells and where are they located |

|       |                 |                                                                                                                                                                                                                                                                                                                                   |
|-------|-----------------|-----------------------------------------------------------------------------------------------------------------------------------------------------------------------------------------------------------------------------------------------------------------------------------------------------------------------------------|
| Basic | Data collection | We do a lot of imaging, so a lot of what we do is collecting a lot of data and collecting all the related metadata                                                                                                                                                                                                                |
| Basic | Data collection | Dealing with capturing those images, analyzing that data to test models on how cells are communicating                                                                                                                                                                                                                            |
| Basic | Data collection | Generate a lot of files from those programs and export to ether various image formats or Excel                                                                                                                                                                                                                                    |
| Basic | Data collection | Of intermediate analysis involving various programs, and then some numerical data that would be in tabular form—cell locations or molecular locations (from images)                                                                                                                                                               |
| Basic | Data collection | Kinetic component and then the quantitative measurements                                                                                                                                                                                                                                                                          |
| Basic | Data collection | Tracking how a given plasmid was constructed                                                                                                                                                                                                                                                                                      |
| Basic | Data collection | Generate raw file—generate flowjo analysis—then you export to Excel to move it around—then you export it to prism to make your graphs                                                                                                                                                                                             |
| Basic | Data collection | With programmed quality checks, data are fed in analysis pipeline. About 20% are rejected (due to, for example, it's irreproducible). 80% are accepted into database                                                                                                                                                              |
| Basic | Data collection | Data are mainly used for identification of peptides in the wide range including human, mouse, yeast, e coli, and other organism that people share common interest in research                                                                                                                                                     |
| Basic | Data collection | Then it needs to be converted to a more compatible format to for easy access it when using the cluster                                                                                                                                                                                                                            |
| Basic | Data collection | Cleaning process is very much a connected part of the process, do analysis, generate qc read out based on analysis, then might go back and correct some of it and do it again. He's never thought about it as 2 different things, for them it's together                                                                          |
| Basic | Data collection | We modify the correlation between activity in one cell between another cell. Maybe that synapse is important in how the two cells work together.                                                                                                                                                                                  |
| Basic | Data collection | The state of the brain at the time                                                                                                                                                                                                                                                                                                |
| Basic | Data collection | What was being done to the cell at the time.                                                                                                                                                                                                                                                                                      |
| Basic | Data collection | (Age of the animal, was anesthesia being used. What time of the day was it.) In Vivo, we play a sound, the frequency of the sound, how long it was (1 mm or so) precisely what happened when.                                                                                                                                     |
| Basic | Data collection | We change this from one day to the next, might totally be different sounds being played. So if I'm looking at someone's data, I need all that data, if I don't have it, it's useless.                                                                                                                                             |
| Basic | Data collection | Do super duper hard experiments that take us a long time where we're basically beating our heads against something for 2 years, building the device, testing the device, something very on the edge of what's possible. Once it works, we get something out the device, and then we write the paper, and then we're onto the next |
| Basic | Data collection | Everything has to be electronic—except lab notebooks, everyone has them written. At some point, I'd love to scan them all in                                                                                                                                                                                                      |

|          |                 |                                                                                                                                                                                                                                                                                                                                                                                                                                                            |
|----------|-----------------|------------------------------------------------------------------------------------------------------------------------------------------------------------------------------------------------------------------------------------------------------------------------------------------------------------------------------------------------------------------------------------------------------------------------------------------------------------|
| Basic    | Data collection | There was a whole workflow—for both cases that were in two different labs, one at NIH and one at the Scripps, analysis was done. The NIH lab, they not only did the analysis, but they continue to develop ways to analyze and come up with new algorithms.                                                                                                                                                                                                |
| Basic    | Data collection | We ran into many complicated problems. With the data, you can't compare numbers across, because the amount of proteins are different and the biological factors are different.                                                                                                                                                                                                                                                                             |
| Basic    | Data collection | The only way to run it is to use that particular lab's software. This is the lab that is constantly developing new software                                                                                                                                                                                                                                                                                                                                |
| Basic    | Data collection | Take LIFF files and convert to Photoshop images that we can use                                                                                                                                                                                                                                                                                                                                                                                            |
| Clinical | Data collection | Have procedure of piloting reviewing, checking the consistency of the data—doing double entry to check the data quality                                                                                                                                                                                                                                                                                                                                    |
| Clinical | Data collection | Images from MRI are converted to use with analysis program                                                                                                                                                                                                                                                                                                                                                                                                 |
| Clinical | Data collection | (Go through free surfer to calculate volumes and surface areas; could be numbers or parts of images etc.)                                                                                                                                                                                                                                                                                                                                                  |
| Clinical | Data collection | My epidemiologist then moves it into SAS when she uses the data. But it lives in SPSS because I can't use SAS very effectively                                                                                                                                                                                                                                                                                                                             |
| Clinical | Data collection | Form data—entered largely in raw fashion, there is some processing that goes on, from primary data we generate other measures. We collect height, weight, etc., collect ffv1. From that we can calculate a bunch of secondary things, like predicted ffv1 from age and height. Or from age height gender and observed ffv1, you can calculate lung age. Or height and weight to BMI. We keep all the processed data.                                       |
| Clinical | Data collection | In his own clinic, he enters everyone's data in after every clinic—also have some of the same measurements—they're patients so they cant be merged with the research data, but you could search clinical data for case studies and the like—not actually incorporated, but there's this ever burgeoning data                                                                                                                                               |
| Clinical | Data collection | With the big project we randomize them on discharge and get referral to state quit line or our own counselors.                                                                                                                                                                                                                                                                                                                                             |
| Clinical | Data collection | Around smoking cessation—of patients seen by our counselor in clinic, we contact them in a month to ask questions such as are they still smoking? Have they been back to Bellevue?                                                                                                                                                                                                                                                                         |
| Clinical | Data collection | We're always missing data with surveys. That's a data collection issue—we have people look over the survey before the person leaves and tell them to fill out the missing parts, but even with that, not 100%                                                                                                                                                                                                                                              |
| Clinical | Data collection | Chart abstraction is a challenge—jump from ICIS to Epic poses difficulties, and then also the hurricane happened and some mothers delivered at Mount Sinai and we're trying to get the data from them—trying to work with medical records, but data retrieved is not as accurate as we expected due lacking of efficient communication and understanding. Also, same data can be recorded at multiple places in EMR. Completeness of data can be an issue. |

|                     |                 |                                                                                                                                                                                                                                                                                                           |
|---------------------|-----------------|-----------------------------------------------------------------------------------------------------------------------------------------------------------------------------------------------------------------------------------------------------------------------------------------------------------|
| Clinical            | Data collection | All chart abstraction is entered into REDCap                                                                                                                                                                                                                                                              |
| Clinical            | Data collection | Information is recorded through being present and listening to patient/physician encounter. Access EPIC and add information that is online in EPIC (vitals) and add to paper records. Paper records are later scanned into EPIC.                                                                          |
| Clinical            | Data collection | Works off baseline clinical data. Confirms things that have been mentioned earlier, grades severity. The sheets are understandable by everyone, even a layperson. She then scans these into EPIC. The system most sponsors or investigative groups use on their end to manage trial data is Medidata Rave |
| Clinical            | Data collection | We're using standard video equipment. Sub-professional, we're using a camera to collect the video now                                                                                                                                                                                                     |
| Clinical            | Data collection | Forms—we are handwriting it, and we store it that way and give them a paper copy                                                                                                                                                                                                                          |
| Clinical            | Data collection | Suzanne, my coordinator, does the bulk of data entry—interface between paper and database—manual entry                                                                                                                                                                                                    |
| Clinical            | Data collection | I'm the clinical implementer and I analyze the data—specify what I want and go over the report that they prepare                                                                                                                                                                                          |
| Clinical            | Data collection | We also have a core set of measures to assess. Self-confidence, depression. As new measures come across in the literature it gets added to the trial (e.g., sleep data)                                                                                                                                   |
| Clinical            | Data collection | Typically, she does her own data analysis                                                                                                                                                                                                                                                                 |
| Clinical            | Data collection | Sometimes, we just look at the images; sometimes, we have to send the images elsewhere to use advanced analysis using software. (I've used a zillion different software packages)                                                                                                                         |
| Clinical            | Data collection | Usually put it in Excel—the data itself                                                                                                                                                                                                                                                                   |
| Clinical            | Data collection | Industry-sponsored projects, with their own databases, those have clinical managers, clinical coordinators                                                                                                                                                                                                |
| Clinical/Pop Health | Data collection | A lot of large secondary data analysis                                                                                                                                                                                                                                                                    |
| Clinical/Pop Health | Data collection | She buys data—she deals with data use agreements, and if legal needs to be involved, etc.—it can be very tedious.                                                                                                                                                                                         |
| Clinical/Pop Health | Data collection | Data entered into REDCap, and then she creates the variables for analysis                                                                                                                                                                                                                                 |
| Clinical/Pop Health | Data collection | 24-hour dietary recalls with the same people over the phone                                                                                                                                                                                                                                               |
| Clinical/Pop Health | Data collection | For dietary recall data—enter it into their system—“ASA24 is a freely available web-based tool that enables automated self-administered 24-hour recalls.”                                                                                                                                                 |
| Clinical/Pop Health | Data collection | Data all goes through different levels of coding and cleaning                                                                                                                                                                                                                                             |
| Med Ed?             | Data collection | Transform data from online programs into Excel and then into SPSS                                                                                                                                                                                                                                         |

|                     |                              |                                                                                                                                                                      |
|---------------------|------------------------------|----------------------------------------------------------------------------------------------------------------------------------------------------------------------|
| Med Ed?             | Data collection              | Some data collected through the SIM center                                                                                                                           |
| Statistics          | Data collection              | We don't collect data, but rather analyze data that                                                                                                                  |
| Statistics          | Data collection              | There are different philosophies for how data should be preprocessed, so right now we have every image processed in several different ways                           |
| Statistics          | Data collection              | Not every subjects image has the full set of different processing                                                                                                    |
| Statistics          | Data collection              | Download unprocessed raw imaging data, do preprocessing ourselves                                                                                                    |
| Clinical            | Data collection              | All homegrown—all created by programmers in house, goes back to 1985                                                                                                 |
| Clinical/Pop Health | Data collection              | Some is just taking estimates form the literature and plugging into the model                                                                                        |
| Basic               | Data collection: opinion (-) | Most problems with exchange of data and slowness of computer in analyzing but we just buy new computers for that                                                     |
| Clinical/Pop Health | Data collection: opinion +   | Overall the data collection and data entry into REDCap is pretty organized, beyond that its organized chaos as its mostly her manipulating the data                  |
| Basic               | Data collection tool         | TECAN                                                                                                                                                                |
| Basic               | Data collection tool         | STORM                                                                                                                                                                |
| Basic               | Data collection tool         | TYPHON                                                                                                                                                               |
| Basic               | Data collection tool         | Bio-rad                                                                                                                                                              |
| Basic               | Data collection tool         | Build our own recording devices, we use our own software—don't buy any                                                                                               |
| Basic               | Data collection tool         | ImageJ                                                                                                                                                               |
| Basic               | Data collection tool         | Acquisition software, and first step data analysis are custom                                                                                                        |
| Basic               | Data collection tool         | Patch-clamp—sold by axon Instruments                                                                                                                                 |
| Basic               | Data collection tool         | Prism                                                                                                                                                                |
| Basic               | Data collection tool         | FlowJo                                                                                                                                                               |
| Basic               | Data collection tool         | ImageJ                                                                                                                                                               |
| Basic               | Data collection tool         | OpenSliceCrowd                                                                                                                                                       |
| Basic               | Data collection tool         | GPMDDB is a database of tandem mass spectra and their assigned peptide sequences. The purpose is to aid in the difficult process of validating peptide MS/MS spectra |
| Basic               | Data collection tool         | PGx is a tool for proteogenomics mapping.                                                                                                                            |
| Basic               | Data collection tool         | GeneSpring                                                                                                                                                           |
| Clinical            | Data collection tool         | Enter questionnaire into data base, do some quality checks                                                                                                           |
| Clinical            | Data collection tool         | RedCap                                                                                                                                                               |
| Clinical            | Data collection tool         | Done on siemens machine here at med center                                                                                                                           |
| Clinical            | Data collection tool         | Voxpro                                                                                                                                                               |
| Clinical            | Data collection tool         | Access databases                                                                                                                                                     |
| Clinical            | Data collection tool         | REDCap                                                                                                                                                               |
| Clinical            | Data collection tool         | REDCap                                                                                                                                                               |



|                     |                      |                                                                                                                                |
|---------------------|----------------------|--------------------------------------------------------------------------------------------------------------------------------|
| Clinical            | Data collection tool | Huge database of looking at the diversity of the microbiome                                                                    |
| Clinical            | Data collection tool | A SurveyMonkey                                                                                                                 |
| Clinical            | Data collection tool | EPIC                                                                                                                           |
| Clinical            | Data collection tool | Randomized trial, we're using Sherlock                                                                                         |
| Clinical            | Data collection tool | iAnnotate, and we are handwriting it, and we store it that way and give them a paper copy.                                     |
| Clinical            | Data collection tool | CRFs into oracle database                                                                                                      |
| Clinical            | Data collection tool | Me and Leo are setting up our own database                                                                                     |
| Clinical            | Data collection tool | Qualtrics                                                                                                                      |
| Clinical            | Data collection tool | Redcap                                                                                                                         |
| Clinical            | Data collection tool | Velos                                                                                                                          |
| Clinical            | Data collection tool | Industry sponsored, through their databases                                                                                    |
| Clinical            | Data collection tool | Medidata Rave                                                                                                                  |
| Clinical            | Data collection tool | Flowjo (one software widely used)                                                                                              |
| Clinical            | Data collection tool | Different kits or assays that are proprietary                                                                                  |
| Clinical/Pop Health | Data collection tool | Qualtrics                                                                                                                      |
| Clinical/Pop Health | Data collection tool | Dedoose                                                                                                                        |
| Clinical/Pop Health | Data collection tool | Redcap                                                                                                                         |
| Clinical/Pop Health | Data collection tool | Snap survey software                                                                                                           |
| Clinical/Pop Health | Data collection tool | ASA24                                                                                                                          |
| Med Ed?             | Data collection tool | Qualtrix                                                                                                                       |
| Med Ed?             | Data collection tool | Redcap                                                                                                                         |
| Med Ed?             | Data collection tool | SurveyMonkey                                                                                                                   |
| Statistics          | Data collection tool | Done on the NYUMC server                                                                                                       |
| Basic               | Data format          | Lab notebooks                                                                                                                  |
| Basic               | Data format          | CSV                                                                                                                            |
| Basic               | Data format          | All the files in their own format—typical for every single lab, if would like to have common platform, will have to figure out |
| Basic               | Data format          | ImageJ—turns into Excel type of sheets                                                                                         |
| Basic               | Data format          | No field specific standards                                                                                                    |
| Basic               | Data format          | Lab notebooks                                                                                                                  |
| Basic               | Data format          | Some proprietary formats                                                                                                       |

|          |             |                                                                                                                                         |
|----------|-------------|-----------------------------------------------------------------------------------------------------------------------------------------|
| Basic    | Data format | Excel                                                                                                                                   |
| Basic    | Data format | Paper notebooks                                                                                                                         |
| Basic    | Data format | Excel files                                                                                                                             |
| Basic    | Data format | Word                                                                                                                                    |
| Basic    | Data format | Every instrument manufacturer has its own raw format. For example, some raw data file can only be read on Windows machines, not on Mac. |
| Basic    | Data format | Excel spreadsheets that consist of three numbers                                                                                        |
| Basic    | Data format | Proprietary formats from the recording amplifiers                                                                                       |
| Basic    | Data format | Simulations in MATLAB (.m) files                                                                                                        |
| Basic    | Data format | Lab notebooks                                                                                                                           |
| Basic    | Data format | Lab notebooks                                                                                                                           |
| Basic    | Data format | Data is electronically recorded—it can be on their own computer but everything is also on shared drive                                  |
| Basic    | Data format | TIFF files                                                                                                                              |
| Basic    | Data format | JPEG                                                                                                                                    |
| Basic    | Data format | Excel spreadsheets                                                                                                                      |
| Basic    | Data format | Word docs                                                                                                                               |
| Basic    | Data format | Spreadsheets with peptide counts.                                                                                                       |
| Basic    | Data format | LIFF files                                                                                                                              |
| Basic    | Data format | Photoshop images                                                                                                                        |
| Clinical | Data format | Analysis and checks are done in SAS                                                                                                     |
| Clinical | Data format | SAS                                                                                                                                     |
| Clinical | Data format | Stata                                                                                                                                   |
| Clinical | Data format | SPSS                                                                                                                                    |
| Clinical | Data format | paper                                                                                                                                   |
| Clinical | Data format | SPSS                                                                                                                                    |
| Clinical | Data format | Paper                                                                                                                                   |
| Clinical | Data format | SPSS                                                                                                                                    |
| Clinical | Data format | DICOM Standard                                                                                                                          |
| Clinical | Data format | An SPSS dataset                                                                                                                         |
| Clinical | Data format | Use standard imaging standards, but he's creating new things where there are no standards (he's creating the standards)                 |
| Clinical | Data format | Excel spreadsheets                                                                                                                      |
| Clinical | Data format | SAS                                                                                                                                     |
| Clinical | Data format | Paper                                                                                                                                   |

|                     |                                 |                                                                                                                                                        |
|---------------------|---------------------------------|--------------------------------------------------------------------------------------------------------------------------------------------------------|
| Clinical            | Data format                     | Excel                                                                                                                                                  |
| Clinical            | Data format                     | Paper                                                                                                                                                  |
| Clinical            | Data format                     | Spreadsheet (.csv)                                                                                                                                     |
| Clinical            | Data format                     | Computer-based forms                                                                                                                                   |
| Clinical            | Data format                     | Paper                                                                                                                                                  |
| Clinical            | Data format                     | Spreadsheets                                                                                                                                           |
| Clinical            | Data format                     | SAS                                                                                                                                                    |
| Clinical            | Data format                     | SPSS                                                                                                                                                   |
| Clinical            | Data format                     | Excel                                                                                                                                                  |
| Clinical            | Data format                     | Excel                                                                                                                                                  |
| Clinical/Pop Health | Data format                     | SAS                                                                                                                                                    |
| Clinical/Pop Health | Data format                     | Stata                                                                                                                                                  |
| Clinical/Pop Health | Data format                     | Excel                                                                                                                                                  |
| Clinical/Pop Health | Data format                     | Feed into an Excel spreadsheet                                                                                                                         |
| Clinical/Pop Health | Data format                     | SPSS                                                                                                                                                   |
| Clinical/Pop Health | Data format                     | Pencil and paper surveys                                                                                                                               |
| Clinical/Pop Health | Data format                     | Excel                                                                                                                                                  |
| Clinical/Pop Health | Data format                     | Stata                                                                                                                                                  |
| Clinical/Pop Health | Data format                     | Dat file                                                                                                                                               |
| Med Ed?             | Data format                     | Paper                                                                                                                                                  |
| Med Ed?             | Data format                     | SPSS                                                                                                                                                   |
| Med Ed?             | Data format                     | SAS                                                                                                                                                    |
| Med Ed?             | Data format                     | STATA                                                                                                                                                  |
| Med Ed?             | Data format                     | R                                                                                                                                                      |
| Med Ed?             | Data format                     | Excel                                                                                                                                                  |
| Basic               | Data management cost allocation | I don't. When I'm writing my NIH grant, I'm using a modular budget so I'm not specifying how...it would be a luxury to specify or ask for such a thing |

|          |                                 |                                                                                                                                                                                                                                                                                                                                                                                                                                                                  |
|----------|---------------------------------|------------------------------------------------------------------------------------------------------------------------------------------------------------------------------------------------------------------------------------------------------------------------------------------------------------------------------------------------------------------------------------------------------------------------------------------------------------------|
| Basic    | Data management cost allocation | He mainly has grants where u don't need to specify where u use the money                                                                                                                                                                                                                                                                                                                                                                                         |
| Basic    | Data management cost allocation | No, not allowed to buy computers through R01s at NYU                                                                                                                                                                                                                                                                                                                                                                                                             |
| Basic    | Data management cost allocation | Yeah, we would include money for the drives and stuff                                                                                                                                                                                                                                                                                                                                                                                                            |
| Basic    | Data management cost allocation | Budget for the storage                                                                                                                                                                                                                                                                                                                                                                                                                                           |
| Basic    | Data management cost allocation | Server—indirect cost—so we wouldn't pay for it so we wouldn't allocate for it                                                                                                                                                                                                                                                                                                                                                                                    |
| Basic    | Data management cost allocation | Not very much, but to a certain extent                                                                                                                                                                                                                                                                                                                                                                                                                           |
| Basic    | Data management cost allocation | Data storage and computation have been included into grants. But the cost on data management has been very seriously underestimated.                                                                                                                                                                                                                                                                                                                             |
| Basic    | Data management cost allocation | Costs—mainly on staffing.                                                                                                                                                                                                                                                                                                                                                                                                                                        |
| Basic    | Data management cost allocation | No. Up until you [the library] got in touch with us, I didn't even know it was something you could budget.                                                                                                                                                                                                                                                                                                                                                       |
| Basic    | Data management cost allocation | No                                                                                                                                                                                                                                                                                                                                                                                                                                                               |
| Basic    | Data management cost allocation | I've started to do that now                                                                                                                                                                                                                                                                                                                                                                                                                                      |
| Basic    | Data management cost allocation | I do think it should be in your grants, and u gotta pay as you go, a lot of people think it should be free                                                                                                                                                                                                                                                                                                                                                       |
| Basic    | Data management cost allocation | Avon foundation, 1.25-million-a-year grant sitting there now that hopefully they're going to approve. In that grant is hefty bioinformatics and storage costs—a lot of mutation analyses in there. Storage and analysis—that's where the costs are. Just puts down as storage costs and makes up a number—he has no idea what it should cost—we've sat around the table working this out with Jim, John Speakman, and they don't know what it should cost either |
| Basic    | Data management cost allocation | So far no, because the scale of what we do is pretty small, and we don't do this routinely. I haven't really thought about allocating something.                                                                                                                                                                                                                                                                                                                 |
| Basic    | Data management cost allocation | "Not specifically, I always do modular budgets"                                                                                                                                                                                                                                                                                                                                                                                                                  |
| Clinical | Data management cost allocation | Data management and statistical analysis in grant (we have a statistician too)                                                                                                                                                                                                                                                                                                                                                                                   |

|          |                                 |                                                                                                                                                                                                  |
|----------|---------------------------------|--------------------------------------------------------------------------------------------------------------------------------------------------------------------------------------------------|
| Clinical | Data management cost allocation | Support for statistician and data entry person                                                                                                                                                   |
| Clinical | Data management cost allocation | Allocated funds to programmer on one                                                                                                                                                             |
| Clinical | Data management cost allocation | The other one is barebones, but the department of health is doing some data merging, etc., and he's paying them                                                                                  |
| Clinical | Data management cost allocation | No                                                                                                                                                                                               |
| Clinical | Data management cost allocation | Yes                                                                                                                                                                                              |
| Clinical | Data management cost allocation | Depends on the project what I put in there. An average project would have 5% for the data management for the clinical side, at least 10% of one person for data management of imaging data       |
| Clinical | Data management cost allocation | Full day a week for image processing                                                                                                                                                             |
| Clinical | Data management cost allocation | For most of my grants, I set aside 10% effort for data management, if its bigger, it will go up—who is usually Alog or his brother.                                                              |
| Clinical | Data management cost allocation | The first couple years of the study when we explicitly had an outside contractor and one was an NYU employee on salary support for a year, there was—we had a budget line item.                  |
| Clinical | Data management cost allocation | Challenges with VA—took a year and half to get laptop purchase approved, and then it was approved on next budget year, so had to wait longer—laptops for usability studies, screen capture, etc. |
| Clinical | Data management cost allocation | Had in my grant a data manager, and then my research coordinator does a lot of course                                                                                                            |
| Clinical | Data management cost allocation | This is billed back to the trial sponsors at a measured rate, i.e., how long does the staff work on this (time focused).                                                                         |
| Clinical | Data management cost allocation | Sponsoring groups include ECOG, Southwestern Oncology Group (SWOG), Radiation Therapy Oncology Group (RTOG), Gynecologic Oncology Group (GOG), others.                                           |
| Clinical | Data management cost allocation | I can't. I wanted to, but the NIH, well the guys at SPA were telling me that it's supposed to come out of indirect funding.                                                                      |
| Clinical | Data management cost allocation | Just piloting—and don't think he answered for other, but don't imagine he would have been the one to deal with, but for data coordinating center imagine they are must haves                     |
| Clinical | Data management cost allocation | Internal data management team funded in the grant.                                                                                                                                               |
| Clinical | Data management cost allocation | Data management in the subcontracts in the grants                                                                                                                                                |

|                     |                                 |                                                                                                                                                                                                                                                                              |
|---------------------|---------------------------------|------------------------------------------------------------------------------------------------------------------------------------------------------------------------------------------------------------------------------------------------------------------------------|
| Clinical            | Data management cost allocation | Always puts in research coordinator in the grants                                                                                                                                                                                                                            |
| Clinical            | Data management cost allocation | Allocate costs for clinical data managers sometimes                                                                                                                                                                                                                          |
| Clinical/Pop Health | Data management cost allocation | She does allocate funds for her programmer                                                                                                                                                                                                                                   |
| Clinical/Pop Health | Data management cost allocation | She puts server management dollars in there in case anyone were to charge me here                                                                                                                                                                                            |
| Clinical/Pop Health | Data management cost allocation | No money for data management                                                                                                                                                                                                                                                 |
| Clinical/Pop Health | Data management cost allocation | DM's time                                                                                                                                                                                                                                                                    |
| Clinical/Pop Health | Data management cost allocation | We always put a line for data management                                                                                                                                                                                                                                     |
| Med Ed?             | Data management cost allocation | Have some funds in our current grants, but we haven't found the right person with the right skillset to be our data manager                                                                                                                                                  |
| Statistics          | Data management cost allocation | She doesn't. "We should be doing that but we usually get those who generate the data to do the management part to a large extent. When they give it to us, there is still management to be done, but it needs to be done by a statistician who will know how it will be used |
| Basic               | Data management responsibility  | I'm the only one responsible for all the data, since I'm the one who stays here.                                                                                                                                                                                             |
| Basic               | Data management responsibility  | Computer science student, who comes once or twice a week and helps with things, but he'll leave at some point                                                                                                                                                                |
| Basic               | Data management responsibility  | Everyone does their own thing                                                                                                                                                                                                                                                |
| Basic               | Data management responsibility  | Each person is in charge of dealing with their own data (until it comes to statistical analysis)                                                                                                                                                                             |
| Basic               | Data management responsibility  | No, this is done at the individual level                                                                                                                                                                                                                                     |
| Basic               | Data management responsibility  | No, for after the process or responsible for long term management                                                                                                                                                                                                            |
| Basic               | Data management responsibility  | I guess I'm in charge of it                                                                                                                                                                                                                                                  |
| Basic               | Data management responsibility  | No one specifically is assigned for data management. Everyone is supposed to contribute, responsible for their data                                                                                                                                                          |

|          |                                |                                                                                                                     |
|----------|--------------------------------|---------------------------------------------------------------------------------------------------------------------|
| Basic    | Data management responsibility | Data repository is not managed by MCIT, but by computational lab people (who?).                                     |
| Basic    | Data management responsibility | During the process the person, postdoc, student—they are responsible for storing the data and analyzing it,         |
| Basic    | Data management responsibility | When they leave, they turn it over to me.                                                                           |
| Basic    | Data management responsibility | Individuals have control over their own data. Other people don't usually interact with that data                    |
| Basic    | Data management responsibility | She's probably responsible for it—long term                                                                         |
| Clinical | Data management responsibility | Yelena is responsible for management data throughout                                                                |
| Clinical | Data management responsibility | Only a couple of people have access, and they are responsible for data entry and distributing datasets for analysis |
| Clinical | Data management responsibility | Person in charge of neuroimaging has her own system                                                                 |
| Clinical | Data management responsibility | Statistician uses the data                                                                                          |
| Clinical | Data management responsibility | A full-time image programmer, part of our group                                                                     |
| Clinical | Data management responsibility | On database side, data manager handles that                                                                         |
| Clinical | Data management responsibility | Mathematician and full-time image programmer manage the tech side of the images                                     |
| Clinical | Data management responsibility | Clinical team—nurse responsible for the overall management of all the data from clinical exams                      |
| Clinical | Data management responsibility | MRI imaging group is largely responsible for quality control                                                        |
| Clinical | Data management responsibility | Pet imaging—responsible for that data                                                                               |
| Clinical | Data management responsibility | I've added them [the radiologists?] to our protocol so they can play with my data too.                              |
| Clinical | Data management responsibility | Have other investigators who are processing my data—doing network analyses and the like                             |
| Clinical | Data management responsibility | Postdocs, coordinators, volunteers, manually entering data                                                          |

|                     |                                |                                                                                                                                                                                                                                                                                                                                                            |
|---------------------|--------------------------------|------------------------------------------------------------------------------------------------------------------------------------------------------------------------------------------------------------------------------------------------------------------------------------------------------------------------------------------------------------|
| Clinical            | Data management responsibility | Aloc runs our servers, not actually NYUMCIT—offline                                                                                                                                                                                                                                                                                                        |
| Clinical            | Data management responsibility | Everyone on his project has access to all the data, all the time                                                                                                                                                                                                                                                                                           |
| Clinical            | Data management responsibility | We sort of have a data manager—this is one of those things I'm learning—say the hospital smoking cessation study. I am working with PI at Pop Health so he has some project managers working with him. For this project, we've had a few project managers, one of whom has an affinity for data management. Assigning that role has been on and off again. |
| Clinical            | Data management responsibility | Everyone who is working on it has access to the study data. The PI can't be supervising everyone all the time.                                                                                                                                                                                                                                             |
| Clinical            | Data management responsibility | We have dedicated staff for managing data.                                                                                                                                                                                                                                                                                                                 |
| Clinical            | Data management responsibility | I set up the Wikis.                                                                                                                                                                                                                                                                                                                                        |
| Clinical            | Data management responsibility | He manages the data, which he likes—he knows it, he has control over it, doesn't depend on someone else, doesn't have to wait, can just do it                                                                                                                                                                                                              |
| Clinical            | Data management responsibility | Industry-sponsored projects, with their own databases, those have clinical managers, clinical coordinators                                                                                                                                                                                                                                                 |
| Clinical/Pop Health | Data management responsibility | The hands-on data management and manipulation the programmer and statistician manages but she's always answering questions                                                                                                                                                                                                                                 |
| Clinical/Pop Health | Data management responsibility | Uses a statistician off site who is totally amazing and gets it and knows what questions to ask and is meticulous                                                                                                                                                                                                                                          |
| Clinical/Pop Health | Data management responsibility | "It's for me and my coordinator"                                                                                                                                                                                                                                                                                                                           |
| Clinical/Pop Health | Data management responsibility | Now there's a 3rd person who's starting to do some analysis                                                                                                                                                                                                                                                                                                |
| Statistics          | Data management responsibility | There are imagers, computer scientists, engineers, doing different things.                                                                                                                                                                                                                                                                                 |
| Statistics          | Data management responsibility | Usually one person on one project. Avoid the conflicting versions and stuff by doing that, if its someone else's project, she doesn't touch it                                                                                                                                                                                                             |
| Basic               | Data organization              | Everyone is responsible for storing their own data. Normally when they leave, they leave behind copies of their data on lab computers, which we are getting backed up. I try to encourage them to store their data in certain formats                                                                                                                      |



|       |                   |                                                                                                                                                                                                                                                                                                                                                    |
|-------|-------------------|----------------------------------------------------------------------------------------------------------------------------------------------------------------------------------------------------------------------------------------------------------------------------------------------------------------------------------------------------|
| Basic | Data organization | I get all their lab notebooks, and for their data files, I say, on the lab computer, I want a folder that has all of the experiments that were published, the data for the experiment that were published in a way that I can cross-reference to your lab notebook (with your name and date) because then the lab notebook will be the explanation |
| Basic | Data organization | There is a little bit standardization—we have a workgroup that has about 30 users—neuroscope—used by many labs, also used within the lab, but not perfect for everything,                                                                                                                                                                          |
| Basic | Data organization | Not always documented because it was in the last paper. Bet everything needs to be really well documented                                                                                                                                                                                                                                          |
| Basic | Data organization | Electrophysiology standards—came from the Stockholm-based group—nobody uses it. Hard to tell if people will use it. U set up a system and if u know it'll work for the next 5 years, you'll use it, but if it's changing year to year might not                                                                                                    |
| Basic | Data organization | Use the shared drives in a disciplined matter—if someone needs to use, will tell other people in the lab, I need to use it next week                                                                                                                                                                                                               |
| Basic | Data organization | Divided and organized by date and image number                                                                                                                                                                                                                                                                                                     |
| Basic | Data organization | Make a folder each day and have different folders inside—one folder that's all the images we have acquired, then a folder of analyzed data                                                                                                                                                                                                         |
| Basic | Data organization | Some stuff is in file name or folder name, but pretty much all in lab notebook. Every acquisition will be correlated with a lab book of what was done for that experiment—regular lab notebook, not electronic “we still write”                                                                                                                    |
| Basic | Data organization | When someone moves out of the lab, they have to give all the data files to someone in the lab, and give very clear instructions of how to go into the data                                                                                                                                                                                         |
| Basic | Data organization | Organized people will have folders of image files with Word doc explaining what it is                                                                                                                                                                                                                                                              |
| Basic | Data organization | Other people might just have folders with dates—again all depends on how careful people are                                                                                                                                                                                                                                                        |
| Basic | Data organization | I've had people come in who want to analyze data from 10 years ago, I've been able to dig out this stuff                                                                                                                                                                                                                                           |
| Basic | Data organization | Info retrieval can be difficult though, can be clunky, depending on my memory, knowing something was there                                                                                                                                                                                                                                         |
| Basic | Data organization | Unconsciously probably                                                                                                                                                                                                                                                                                                                             |
| Basic | Data organization | The upfront handling, people do what they're most comfortable with their own data. Then when we're publishing think more about it, how we're going to present it, and then different journals sometimes have different requirements                                                                                                                |
| Basic | Data organization | As far as organizing it? It isn't organized” (laughs)                                                                                                                                                                                                                                                                                              |
| Basic | Data organization | Postdoc, you write it down, and it's illegible. Individual lab notebooks scattered throughout. I've got copies of their files, and analysis files, multiple backups, but everyone is in charge of their own files. It might be the same experiment, but each person might have their own way of writing it down.                                   |
| Basic | Data organization | No established data workflows                                                                                                                                                                                                                                                                                                                      |

|          |                   |                                                                                                                                                                                                                   |
|----------|-------------------|-------------------------------------------------------------------------------------------------------------------------------------------------------------------------------------------------------------------|
| Basic    | Data organization | If I'm working on a manuscript, all the MATLAB figs, scripts that a relevant for a figure, I will have a folder for each figure, they will put all that information into that folder                              |
| Basic    | Data organization | No overarching organizational scheme                                                                                                                                                                              |
| Basic    | Data organization | I will have a folder for each figure, they will put all that information into that folder                                                                                                                         |
| Basic    | Data organization | If something becomes critical, it goes into the Dropbox—then you'll have all the information related to that paper in a folder                                                                                    |
| Basic    | Data organization | Under each name (of people in lab)                                                                                                                                                                                |
| Basic    | Data organization | For clinical trials, yes, for lab based, everyone knows I'll wring their neck if data is not on shared drive                                                                                                      |
| Basic    | Data organization | "Not really standard procedures, although I should, I realize that" (laughing)                                                                                                                                    |
| Clinical | Data organization | Data manager, and we are aware about what it takes to have complete, accurate, and well protected data                                                                                                            |
| Clinical | Data organization | So for each type of procedure we set up process                                                                                                                                                                   |
| Clinical | Data organization | (Re: data dictionary) For publicly available data—Don't create own, use ones they offer                                                                                                                           |
| Clinical | Data organization | (Re: data dictionary) For prospective—he hasn't had a big enough one that it was necessary, its small enough that he kind of knows what everything is and means                                                   |
| Clinical | Data organization | Files all organized—working copy, and on a regular basis copy into permanent master. All in the data folder, everything except imaging, which is a little different                                               |
| Clinical | Data organization | Variables have names and labels within SPSS                                                                                                                                                                       |
| Clinical | Data organization | Relational databases linked to individual subject members—not containing personal identifiers                                                                                                                     |
| Clinical | Data organization | Data dictionary, we sort of have one, because you can't possibly have a big dataset without having one. But we don't have one that is set up in the classic sense.                                                |
| Clinical | Data organization | "I've tried to start putting together different folders for everything, tried to organize it, but there's a lot of data management stuff and you don't get any formal training in data management"                |
| Clinical | Data organization | Have generic system for organizing data. Use this to create paper "cheat sheets" that are trial specific that collect information trial sponsor or investigative group wants to collect.                          |
| Clinical | Data organization | It's all organized by grants, my whole infrastructure is stored on the wiki.                                                                                                                                      |
| Clinical | Data organization | Work together with data coordinating center to design—most recently worked with Cleveland                                                                                                                         |
| Clinical | Data organization | Now ongoing prospective studies are more organized out of Michigan                                                                                                                                                |
| Clinical | Data organization | Truth be told in clinical trials, there is not data to look at because I'm supposed to be blinded and I'm not supposed to look at it (he's not organizing the data, data is held at the data coordinating center) |
| Clinical | Data organization | There is an effort to try to make sure there are common elements that would allow greater uniformity of sharing—part of it is this notion that nephrologists don't get in the sandbox and play nicely             |
| Clinical | Data organization | Sit down, this is what we want the data to look like—and the data coordinating center exports the data, I don't really have direct access to the data—biannual investigator meeting. I can't even log in          |
| Clinical | Data organization | Yes, have data dictionaries and data cleaning                                                                                                                                                                     |

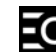

|                     |                   |                                                                                                                                                                                                                                                                                                                                                      |
|---------------------|-------------------|------------------------------------------------------------------------------------------------------------------------------------------------------------------------------------------------------------------------------------------------------------------------------------------------------------------------------------------------------|
| Clinical            | Data organization | Data cleaning—looking for outlier variables and quality                                                                                                                                                                                                                                                                                              |
| Clinical            | Data organization | Hebrew Home for the Aged and St. Johns. Documented data management.                                                                                                                                                                                                                                                                                  |
| Clinical            | Data organization | Postdocs are put on the IRB, learn about data mgmt., training, meet with statistician (St. Johns), access granted through internal system.                                                                                                                                                                                                           |
| Clinical            | Data organization | Data dictionary: Usually have some sort of file describing fields                                                                                                                                                                                                                                                                                    |
| Clinical            | Data organization | Sometimes if I make major changes I keep a copy so I have an audit trail, so I'll have 20 different versions, but it's not really a problem, it's just something I do                                                                                                                                                                                |
| Clinical            | Data organization | Sometimes can have challenges with who has what version, putting it back together—sharing data—collaborative work                                                                                                                                                                                                                                    |
| Clinical            | Data organization | Folders—each folder has subfolders, I'm fairly well organized—subfolders within subfolders                                                                                                                                                                                                                                                           |
| Clinical            | Data organization | Share raw lab data using Dropbox                                                                                                                                                                                                                                                                                                                     |
| Clinical/Pop Health | Data organization | Programmer is supposed to annotate all her SAS programs to write what all the codes mean, why do we include this not that, all our decisions                                                                                                                                                                                                         |
| Clinical/Pop Health | Data organization | Had a doc with all the explanations in Word, so have that as a backup                                                                                                                                                                                                                                                                                |
| Clinical/Pop Health | Data organization | No standard methodology or process                                                                                                                                                                                                                                                                                                                   |
| Clinical/Pop Health | Data organization | We have a data dictionary but it's kind of a short handy one.                                                                                                                                                                                                                                                                                        |
| Clinical/Pop Health | Data organization | Data dictionary is where the main translation would have to be, or they would have to know how we named the variables                                                                                                                                                                                                                                |
| Clinical/Pop Health | Data organization | Then we export it and through the data cleansing process and SPSS, that's where the final data and final variables are, no intermediate step                                                                                                                                                                                                         |
| Clinical/Pop Health | Data organization | Have original, code, and final on the G drive                                                                                                                                                                                                                                                                                                        |
| Clinical/Pop Health | Data organization | We have files created for different iterations as we go through cleaning variables, and then usually have a final output data file, and those can be read into SAS                                                                                                                                                                                   |
| Clinical/Pop Health | Data organization | For secondary datasets, we have the original as it was reported to us                                                                                                                                                                                                                                                                                |
| Med Ed?             | Data organization | All the data that came before RoMEO are now in the RoMEO dataset—they've merged into 1                                                                                                                                                                                                                                                               |
| Statistics          | Data organization | Put them in one place organized so we can go into one site, ftp, or something to download them                                                                                                                                                                                                                                                       |
| Statistics          | Data organization | We have a system here, we organize after we have finished the project (at least to some degree)—organization of the code, keep original data, the script that will change the data, the analysis, the results—each has its own directory ( <i>these are within each project directory, which are within each individual researcher's directory</i> ) |
| Statistics          | Data organization | There will be a read me file that describes what things are, where they are                                                                                                                                                                                                                                                                          |

|            |                                |                                                                                                                                                                                                                                                                                                                                                   |
|------------|--------------------------------|---------------------------------------------------------------------------------------------------------------------------------------------------------------------------------------------------------------------------------------------------------------------------------------------------------------------------------------------------|
| Statistics | Data organization              | This is a requirement of hers—she goes and checks to make sure the researchers are doing it—you should be able to understand where and what things are if the researcher is not around                                                                                                                                                            |
| Statistics | Data organization              | No standard processes—depends on type of data, depends on the question                                                                                                                                                                                                                                                                            |
| Statistics | Data organization              | Right now it's by investigator and then by project—so still need to rely on memory that oh there was a dataset that might be useful for this statistical method, go into memory, and try thinking of where it would be                                                                                                                            |
| Basic      | Data organization: opinion (-) | Always my nightmare that someone will say, ten years from now, "I don't think I can reproduce that result, can you validate what you published?" And the person who generated it is gone                                                                                                                                                          |
| Basic      | Data organization: opinion (-) | That's an example of the whole problem. You need to have certain standards for something like a lab notebook. It's hard to impose [on print]. Software forces you to follow a format.                                                                                                                                                             |
| Basic      | Data organization: opinion (-) | Human images—certain journals in order publish u have to upload your data—but it's a total mess because it was organized form the top down                                                                                                                                                                                                        |
| Basic      | Data organization: opinion (-) | People want someone else to manage their data                                                                                                                                                                                                                                                                                                     |
| Basic      | Data organization: opinion (-) | Academia: All the knowledge stays with the postdoc or student—won't stay in my head long won't stay in their head long                                                                                                                                                                                                                            |
| Basic      | Data organization: opinion (-) | When someone leaves the lab the level of organization of the data and their level of conscientiousness of how they labeled and organized their data for the next person—not always up to par                                                                                                                                                      |
| Basic      | Data organization: opinion (-) | Computer files, don't know what file names are, then you have the handwritten lab notebook, bad handwriting                                                                                                                                                                                                                                       |
| Basic      | Data organization: opinion (-) | Cataloging items that are stored, their lineages, histories, etc., can be really challenging, probably something we're not that good at                                                                                                                                                                                                           |
| Basic      | Data organization: opinion (-) | If don't have good understanding, have to pretty much throw that away                                                                                                                                                                                                                                                                             |
| Basic      | Data organization: opinion (-) | The challenge in organizing data is the size of the data. They are just too huge.                                                                                                                                                                                                                                                                 |
| Basic      | Data organization: opinion (-) | The messiness of the data, like any data sets in any other research area.                                                                                                                                                                                                                                                                         |
| Basic      | Data organization: opinion (-) | The proprietary software that runs the machinery names everything by date. So if two people do different experiments on the same day, the files could have the same name.                                                                                                                                                                         |
| Basic      | Data organization: opinion (-) | A weirdness in the medical center that I've never experienced before—health care is the major focus—it has to be—but because of that, it's been hard to operate—purchasing is awkward, human resources I awkward—shipping and receiving has gotten much better, accounts payable is terrible—all these things u kind of rely on as an institution |
| Basic      | Data organization: opinion (-) | I'd love to say I would stop and catalog—but probably wouldn't—to carefully construct all the data from the project, it's probably already easy enough to find                                                                                                                                                                                    |

|          |                                |                                                                                                                                                                                                                                                                                                                                                                                                                  |
|----------|--------------------------------|------------------------------------------------------------------------------------------------------------------------------------------------------------------------------------------------------------------------------------------------------------------------------------------------------------------------------------------------------------------------------------------------------------------|
| Basic    | Data organization: opinion (-) | I don't think it's the kind of stuff that most people would really want—to have clear and really good read me docs for every script etc.—I think it would be a really big headache—if someone asks, then I can do it, I'll do it for the 4 people who really care, but to have to do it all the time for everything, I could spend my time better elsewhere                                                      |
| Basic    | Data organization: opinion (-) | They filtered the data in their own way, and u query that data, all u can pull out is their filtered data and they got it wrong. What they thought was a mutation wasn't a mutation                                                                                                                                                                                                                              |
| Basic    | Data organization: opinion (-) | Gene expression data is cataloged elsewhere—but I don't know how to find most of it anywhere, not cataloged in a way, unless u remember where the data was                                                                                                                                                                                                                                                       |
| Basic    | Data organization: opinion (-) | Yes, that is the most challenging part—would be looking at the data. What is the most fair way to present the data? What is the most fair way to represent the data that ends up in the final collection of data.                                                                                                                                                                                                |
| Basic    | Data organization: opinion (-) | “At the time that I started my lab, we weren't really collecting this data, it started gradually, so I didn't really set up procedures”                                                                                                                                                                                                                                                                          |
| Clinical | Data organization: opinion (-) | Pulling in data, concerned about quality—problematic to do quality control of existing data                                                                                                                                                                                                                                                                                                                      |
| Clinical | Data organization: opinion (-) | Retrospective studies of EMR data—biggest data quality problem is just being confident in the data—makes it a bit scary                                                                                                                                                                                                                                                                                          |
| Clinical | Data organization: opinion (-) | Data quality problems could be a combo of putting data in wrong in the EMR or pulling data wrong                                                                                                                                                                                                                                                                                                                 |
| Clinical | Data organization: opinion (-) | That's the problem, every new project I have to figure out a new workflow, including who's going to pull the data, who's going to do the next steps.                                                                                                                                                                                                                                                             |
| Clinical | Data organization: opinion (-) | It's a big problem, we don't have an army of people, we only have one statistician, that's it—could definitely use a workflow where one team member is a database programmer who would pull the data                                                                                                                                                                                                             |
| Clinical | Data organization: opinion (-) | But SAS and SPSS handle longitudinal datasets differently—one uses columns, one uses rows. You have to write code to flip it to deal with it. So need to be able to create a dataset that you can use it in whatever form you need it to.                                                                                                                                                                        |
| Clinical | Data organization: opinion (-) | Challenges in organizing and keeping it together                                                                                                                                                                                                                                                                                                                                                                 |
| Clinical | Data organization: opinion (-) | The data is not that easy for searchability, if you wanted to do data query, you can't really do that without doing select if and ___and ____, and then SPSS gets mad at you sometimes and won't give you anything and you have to go in and figure out what if and or is messing it up.                                                                                                                         |
| Clinical | Data organization: opinion (-) | Another issue is missing data. There are a lot of ways to deal with missing data, drop the person, or do imputation. Right now, it's just missing, we haven't imputed anything. “I was writing a grant for New York, I had magna give me a dataset. Trying to run regression models. SPSS kept saying it couldn't run the models because it said it only had 6 people in it (because there were missing fields)” |
| Clinical | Data organization: opinion (-) | It was a nightmare to set up the database for the hospitalized smokers. 3 failed subcontracts to set up the databases—it eventually came together but it did delay the work. We started out on paper and are catching up on the backlog now.                                                                                                                                                                     |

|                     |                                |                                                                                                                                                                                                                                                                                                                                                                                                                                                     |
|---------------------|--------------------------------|-----------------------------------------------------------------------------------------------------------------------------------------------------------------------------------------------------------------------------------------------------------------------------------------------------------------------------------------------------------------------------------------------------------------------------------------------------|
| Clinical            | Data organization: opinion (-) | You don't think about it until it's too late. Our data manager is in the process of doing it but I don't have a great handle on it right now. Having a data dictionary organized by topic would help                                                                                                                                                                                                                                                |
| Clinical            | Data organization: opinion (-) | It's tricky and messy because it's part of U01 so it's a consortium. So we have to set up a de-identified set to share and multi-site analyses and we're behind on that, with the trouble setting up the databases, the hurricane, another part is that we don't [have a dedicated manager] (because the data manager is also doing 6 other things) so it's not like I can say to the consortium, here's the name phone of the person, contact her. |
| Clinical/Pop Health | Data organization: opinion (-) | Keeping it clean and training programmers—it's very complex data and no one can drop in and know it                                                                                                                                                                                                                                                                                                                                                 |
| Clinical/Pop Health | Data organization: opinion (-) | Someone is starting to work with me to do the analysis and that's the main challenge, explaining the variables—it's not complicated, just translation                                                                                                                                                                                                                                                                                               |
| Statistics          | Data organization: opinion (-) | "Still trying to figure out who has which data!"                                                                                                                                                                                                                                                                                                                                                                                                    |
| Clinical            | Data organization: opinion (-) | It's very hard for me to get data out of Velos—I often can't get what I need someone has to go in and pull it for me                                                                                                                                                                                                                                                                                                                                |
| Clinical            | Data organization: opinion (-) | There hasn't been a really good handoff system. Some data were collected a long while ago but have not yet been processed due to lack of resources                                                                                                                                                                                                                                                                                                  |
| Clinical            | Data organization: opinion (-) | Some data were stored at a "secure" place, but now I don't have access to it so that I can just analyze myself                                                                                                                                                                                                                                                                                                                                      |
| Clinical            | Data organization: opinion (-) | What data mgmt. support is missing                                                                                                                                                                                                                                                                                                                                                                                                                  |
| Clinical            | Data organization: opinion (-) | Lack of statistical support. Statistician comes in once a week. But could use him more.                                                                                                                                                                                                                                                                                                                                                             |
| Clinical/Pop Health | Data organization: opinion (-) | Strength with this research is all the different types of data, so making sure these can all line up and speak together is a real challenge—that's the number one challenge for me                                                                                                                                                                                                                                                                  |
| Clinical/Pop Health | Data organization: opinion (-) | Can be challenge over in who's working on the project, and it's not always documented                                                                                                                                                                                                                                                                                                                                                               |
| Clinical/Pop Health | Data organization: opinion (-) | "We've been screwed, it's taken us 2 weeks to redo things, it drives me crazy"                                                                                                                                                                                                                                                                                                                                                                      |
| Med Ed?             | Data organization: opinion (-) | No data infrastructure—disparate datasets sit on hard drives, we have to compile when we want to use the data for research                                                                                                                                                                                                                                                                                                                          |
| Statistics          | Data organization: opinion (-) | It probably should be done, but she hasn't figured out the best way to do it. It's really knowledge of the analysis that is most important—data management is part of data analysis at this point                                                                                                                                                                                                                                                   |
| Basic               | Data organization: opinion +   | It would be nice if was really easy for everyone to access everyone's data. 3 or 4 years ago I said—anytime someone joins the lab, I sit down with them and say how I want them to keep their lab notebook.                                                                                                                                                                                                                                         |
| Basic               | Data organization: opinion +   | They've realized they need to have a common platform.                                                                                                                                                                                                                                                                                                                                                                                               |

|                     |                              |                                                                                                                                                                                                                                    |
|---------------------|------------------------------|------------------------------------------------------------------------------------------------------------------------------------------------------------------------------------------------------------------------------------|
| Basic               | Data organization: opinion + | I think the library is well positioned to help with that. But any overarching scheme usually scares the hell out of me because the medical center will do what's right for the medical center and I need to do what's right for me |
| Basic               | Data organization: opinion + | Research people need to play by their own sets of rules                                                                                                                                                                            |
| Clinical            | Data organization: opinion + | I collaborate with people in the school, they say it's too difficult to describe data. To me its fundamental to have meaningful straightforward data                                                                               |
| Clinical            | Data organization: opinion + | Billing data—it's as clean as it gets                                                                                                                                                                                              |
| Clinical            | Data organization: opinion + | Not a big deal to keep it data organized. Naturally good at organization, and there is good communication across research team. This helps avoid and solve problems.                                                               |
| Clinical            | Data organization: opinion + | He's pretty comfortable that he can just do what he needs to do in Excel                                                                                                                                                           |
| Clinical            | Data organization: opinion + | I find that if I'm not organized, I have way too many balls in the air, so I am meticulous about keeping it organized on my computer                                                                                               |
| Clinical/Pop Health | Data organization: opinion + | I've learned a lot about how important data management is just from having to do it myself, so I've been talking to someone about how to do it, how to do it well, and how to write it into a grant                                |
| Statistics          | Data organization: opinion + | This (rigorous) system has developed from my long and painful career of trying to pull out old data                                                                                                                                |
| Clinical            | Data organization: opinion + | Data quality as service? With a good data dictionary and standardized procedures, almost anyone could help with data quality/cleaning.                                                                                             |
| Med Ed?             | Data organization: opinion + | What we feel a huge need for is tagging our variables more consistently to help when we combine data. "I really love REDCap for that"                                                                                              |
| Basic               | Data preservation            | I would like to be able to access the data indefinitely. File formats can change, and that is a worry that I can't access it because the format changed.                                                                           |
| Basic               | Data preservation            | I would say it's not unusual that I might go back 20 years ago. So it's not impossible that I would go back. I would rather be able to read it forever.                                                                            |
| Basic               | Data preservation            | We have at least 2 copies of everything, sometimes 3                                                                                                                                                                               |
| Basic               | Data preservation            | Just stay on those hard drives and servers, although he has put a few datasets on the CRCNS site                                                                                                                                   |
| Basic               | Data preservation            | NIH requires for 10 years—that's another interesting thing, I came from university brought a truck load of papers, because we needed to keep the data but no one ever looked at it. No one really checks                           |
| Basic               | Data preservation            | Most of the super computers are useful for big bulk work. But in terms of data mining, every lab, in every field of science, it's still the personal computer that wins                                                            |
| Basic               | Data preservation            | Raw data does have a back up in microscopy core for at least some                                                                                                                                                                  |
| Basic               | Data preservation            | Once you're done with data, you keep it on that hard drive                                                                                                                                                                         |
| Basic               | Data preservation            | I definitely don't want to get rid of data if it's not published                                                                                                                                                                   |
| Basic               | Data preservation            | Once it is published, try to keep the data for as long as he thinks people will be interested                                                                                                                                      |
| Basic               | Data preservation            | Keep data for at least 5 years after its been published. But he isn't sure he always does it                                                                                                                                       |

|          |                   |                                                                                                                                                                                                                                                 |
|----------|-------------------|-------------------------------------------------------------------------------------------------------------------------------------------------------------------------------------------------------------------------------------------------|
| Basic    | Data preservation | Basically images in little database, proprietary file tells u where everything is. If u lost that file, or it got corrupted, if u really wanted to go in to get it, u could always get the images out                                           |
| Basic    | Data preservation | Would save at each stage—so data amplifies throughout the project                                                                                                                                                                               |
| Basic    | Data preservation | Often make 2 copies, I have at least one copy, and then the individual who collected the data will have their own copy. members of the lab will take a copy when they go on                                                                     |
| Basic    | Data preservation | Take them with them in case they need to revise a paper or just want a copy of it                                                                                                                                                               |
| Basic    | Data preservation | Ideally my entire career (laughs) and then going forward, other peoples' careers are building here. So decades would be ideal really                                                                                                            |
| Basic    | Data preservation | No responsibility for data after the process                                                                                                                                                                                                    |
| Basic    | Data preservation | Ideally, data should not be thrown away                                                                                                                                                                                                         |
| Basic    | Data preservation | Usually 5 years, he would think.                                                                                                                                                                                                                |
| Basic    | Data preservation | Forever                                                                                                                                                                                                                                         |
| Basic    | Data preservation | Everyone in the lab had to prove that they had a daily back up plan—and Rachel would hound them until they did that, so I feel like we're at least taken care of                                                                                |
| Basic    | Data preservation | Infinite                                                                                                                                                                                                                                        |
| Basic    | Data preservation | Too huge to host forever                                                                                                                                                                                                                        |
| Basic    | Data preservation | When we all used to use jump drives and then we had Jaz drives, when I heard it was going to be phased out, I loaded it all to hard drives, CDs, DVDs—that's how we had to do it for years.                                                     |
| Basic    | Data preservation | Not a problem anymore, we all use the same programs now, there's been a consolidation, it wasn't the case before                                                                                                                                |
| Basic    | Data preservation | Now at least everything is backed up, and I can find it everyone in the world                                                                                                                                                                   |
| Basic    | Data preservation | Backs everything up on a spinning disk hard drive, doesn't worry about it because everything is backed up elsewhere too, but he might replace it with a flash drive so he doesn't have to worry about breaking it, but flash is a little slower |
| Basic    | Data preservation | All his data from past 10 years, 500 GBs, on a hard drive that he takes with him everywhere, backs everything up to it everyday                                                                                                                 |
| Basic    | Data preservation | If the data's bad, not for long, but it can be useful forever                                                                                                                                                                                   |
| Basic    | Data preservation | Probably ten years [data should be available] for data that didn't make it to publication. For data that did get published, there's a central database that everyone could put it in , [that would be good]                                     |
| Basic    | Data preservation | Count on the MCIT computers and servers being backed up—haven't had issues yet, haven't lost any data we can't recover                                                                                                                          |
| Basic    | Data preservation | I haven't deliberately gotten rid of any, but it's growing exponentially, so it's getting more difficult to keep everything                                                                                                                     |
| Basic    | Data preservation | Want to keep the data around because there are new methods created to get more info out of data.                                                                                                                                                |
| Clinical | Data preservation | I would die if I came in and one day was my data was gone—don't back up as much as I should, I guess I trust that the shared drive is ok.                                                                                                       |



|          |                   |                                                                                                                                                                                                     |
|----------|-------------------|-----------------------------------------------------------------------------------------------------------------------------------------------------------------------------------------------------|
| Clinical | Data preservation | Mostly implicit in the process—save dataset, data dictionary, code that was used to generate results. All is organized on the server                                                                |
| Clinical | Data preservation | He has a copy on his external hard drive—that's the back up                                                                                                                                         |
| Clinical | Data preservation | Forever                                                                                                                                                                                             |
| Clinical | Data preservation | External back up systems that are linked to them                                                                                                                                                    |
| Clinical | Data preservation | We have an integrated network that's off the NYU hub of all the comps that are involved                                                                                                             |
| Clinical | Data preservation | Publication=end point—becomes a final view—all input into that publication becomes frozen                                                                                                           |
| Clinical | Data preservation | Forever—I'm doing autopsies now and doing brain scans of people from 30 years ago                                                                                                                   |
| Clinical | Data preservation | There will always have to be someone to manage it—the default is him, but if he has money the default quickly shifts to someone that he's paying to do it.                                          |
| Clinical | Data preservation | I don't know—whatever NIH wants.                                                                                                                                                                    |
| Clinical | Data preservation | I haven't been backing up stuff that's on the VA server, I probably should                                                                                                                          |
| Clinical | Data preservation | She backs it up every week on an external hard drive                                                                                                                                                |
| Clinical | Data preservation | Keep it forever                                                                                                                                                                                     |
| Clinical | Data preservation | The paper trail for clinical trials is stored a defined number of years both in original paper and in EPIC.                                                                                         |
| Clinical | Data preservation | She keeps her original documents and they are also scanned into EPIC. That's her backup.                                                                                                            |
| Clinical | Data preservation | They must hold onto data until the "close out visit" with the trial sponsors. This can be many years after the trial is done. After that, the data is then under the control of NYU(?) or sponsors? |
| Clinical | Data preservation | Personally she feels print data should be held for a minimum of 7–10 years after a patient's death.                                                                                                 |
| Clinical | Data preservation | Now that more data is electronic, it may be useful to keep data forever.                                                                                                                            |
| Clinical | Data preservation | Most people are signing a release form saying that I can keep it forever                                                                                                                            |
| Clinical | Data preservation | If it's de-identified it should be permanent. For NIH, I suppose, but for my own data, it's not as important.                                                                                       |
| Clinical | Data preservation | 6 months after done—moved to NI DDK—data repository                                                                                                                                                 |
| Clinical | Data preservation | Everything—whole Cleveland database gets dumped, part of the public knowledge (NIDDK)                                                                                                               |
| Clinical | Data preservation | That'll be the same for Neptune, that'll be the same for care GN, now I think every R01—at the completion of the trial mandatory to share                                                           |
| Clinical | Data preservation | In perpetuity                                                                                                                                                                                       |
| Clinical | Data preservation | After research, we still keep the data available to postdocs for secondary data analysis. Paper ideas abound from the datasets.                                                                     |
| Clinical | Data preservation | Usually keep anonymized data—supposed to keep published for years and years                                                                                                                         |
| Clinical | Data preservation | But if data doesn't need to be stored, not supposed to store it. Patient identity is stripped as soon as possible                                                                                   |
| Clinical | Data preservation | Just keeps the data on the virtual drives                                                                                                                                                           |

|                     |                   |                                                                                                                                        |
|---------------------|-------------------|----------------------------------------------------------------------------------------------------------------------------------------|
| Clinical            | Data preservation | You're supposed to keep it a really long time. You can't hold on to identified though. Or my research doesn't warrant it               |
| Clinical            | Data preservation | I would be dead if all this disappeared                                                                                                |
| Clinical            | Data preservation | It still sits on my drive,                                                                                                             |
| Clinical            | Data preservation | Infinitely, as long as I'm here                                                                                                        |
| Clinical/Pop Health | Data preservation | Backed up in Philly and NJ now                                                                                                         |
| Clinical/Pop Health | Data preservation | HMO data—they had a secure file transfer system so she doesn't have originals—that stuff is really not hers to share, a lot of data    |
| Clinical/Pop Health | Data preservation | After, it just sits on their server and collects dust                                                                                  |
| Clinical/Pop Health | Data preservation | "Forever" [Laughs]                                                                                                                     |
| Clinical/Pop Health | Data preservation | Backed up on an external hard drive—all de-identified data so there's not a big risk in keeping it in multiple places                  |
| Clinical/Pop Health | Data preservation | "Right now everything's here—right after Sandy made copies in different places but now everything here"                                |
| Clinical/Pop Health | Data preservation | "Forever, this is important [laughing], isn't that what everyone says?"                                                                |
| Clinical/Pop Health | Data preservation | "I'm pretty fanatic about not saving anything on desktops, everything goes on the shared drive. The only exception is the IRI dataset" |
| Clinical/Pop Health | Data preservation | One small one is just living on our shared drive somewhere. Haven't thought about what I'd want to do with it when done                |
| Clinical/Pop Health | Data preservation | "I mean forever, I would never want to get rid of it"                                                                                  |
| Med Ed?             | Data preservation | We do individual backups too, portable hard drives.                                                                                    |
| Med Ed?             | Data preservation | Has copies in Dropbox and box, but it's not a centralized process                                                                      |
| Med Ed?             | Data preservation | "And there's always your sent folder when you're really desperate"                                                                     |
| Med Ed?             | Data preservation | Registries—never finished—building new cohort, working on connecting all datasets                                                      |
| Med Ed?             | Data preservation | We're trying to emulate Framingham, so we're on the long path                                                                          |
| Med Ed?             | Data preservation | Want to keep as much data for as long as possible                                                                                      |
| Med Ed?             | Data preservation | No goal of dumping educational data warehouse data                                                                                     |
| Statistics          | Data preservation | Data is stored in these directories "forever"                                                                                          |
| Statistics          | Data preservation | Data be available forever—and usable for that long as well                                                                             |
| Basic               | Data preservation | I think 10 years was a made up number, 5 years is probably more realistic, after that technology changes                               |

|                     |                                |                                                                                                                                                                                                                                                         |
|---------------------|--------------------------------|---------------------------------------------------------------------------------------------------------------------------------------------------------------------------------------------------------------------------------------------------------|
| Basic               | Data preservation              | Keep it in the same place right now, probably would be good to be able to move it somewhere else                                                                                                                                                        |
| Basic               | Data preservation: opinion (-) | We had long discussions, had plans, there were some good people, they left, and then they started to charge us excessively I would say                                                                                                                  |
| Basic               | Data preservation: opinion (-) | The reality is software programs change, all these things change, so in reality, you don't generally go back more than 5 years                                                                                                                          |
| Basic               | Data preservation: opinion (-) | They haven't been able to set it up on the server here at NYU, mainly due to the lack of enough resource from IT. (Hospital takes higher priority than research.)                                                                                       |
| Basic               | Data preservation: opinion (-) | No procedures. I'm sure if this was a clinical dept. that would be different. It's not human data, so basic labs are little fiefdoms.                                                                                                                   |
| Basic               | Data preservation: opinion (-) | I don't think it's happened that I couldn't get it, but the barrier was so high, it wasn't worth my time.                                                                                                                                               |
| Basic               | Data preservation: opinion (-) | I'm about to use up my shared drive space soon                                                                                                                                                                                                          |
| Basic               | Data preservation: opinion (-) | Evgeny Nudler— they built their own servers, expensive really high quality hard drive—it was stolen—it had a year's worth of work on it—crystal structures, not backed up                                                                               |
| Basic               | Data preservation: opinion (-) | When asked "Why don't u use storage available here," said, "we like to do our own thing"                                                                                                                                                                |
| Basic               | Data preservation: opinion (-) | There is no readme file or data dictionary included with it. Usually, the work is done and gone through publication. So they basically store all their data and then gave their files to me, and so if I have any questions, I look at the spreadsheets |
| Basic               | Data preservation: opinion (-) | To go back to the raw data, I'd have to ask my grad student.                                                                                                                                                                                            |
| Basic               | Data preservation: opinion (-) | Big problem is when people leave the lab and the data is not organized in a way that she knows what's going on, what everything means.                                                                                                                  |
| Basic               | Data preservation: opinion (-) | Some people leave read me files about where everything is saved (there is only one person she can think of who did it very well over 17 years); most don't leave anything                                                                               |
| Basic               | Data preservation: opinion (-) | They run out of time and say, "Here are all my DVDS"                                                                                                                                                                                                    |
| Basic               | Data preservation: opinion (-) | Keeping data for a long time—it can be a problem, when I came here I brought data on optical discs that you can't read anymore                                                                                                                          |
| Clinical            | Data preservation: opinion (-) | Have specific needs that clinical trials don't have—hard for our data to fit in their database                                                                                                                                                          |
| Clinical/Pop Health | Data preservation: opinion (-) | She has some data that she's supposed to destroy when research is complete (as part of the data use agreement) but she doesn't want to do it, she thinks it's a shame                                                                                   |
| Clinical/Pop Health | Data preservation: opinion (-) | I would be happy to have anyone else manage it at any step of the way (laughing) but I would want to have some control over who uses it and how it's used                                                                                               |
| Clinical/Pop Health | Data preservation: opinion (-) | "We had bad experience with Sandy that some people lost data on the servers so we back it up elsewhere"                                                                                                                                                 |
| Basic               | Data preservation: opinion (-) | But possible to lose metadata—so it depends how good your notebook entries are                                                                                                                                                                          |
| Basic               | Data preservation: opinion (-) | Haven't thrown anything out but moving all this stuff around is a pain                                                                                                                                                                                  |
| Basic               | Data preservation: opinion (-) | One of the programs we used a lot, a lab program, isn't around anymore. I don't think I have any computer that could open those files directly                                                                                                          |

|                     |                                |                                                                                                                                                                                                                                                                       |
|---------------------|--------------------------------|-----------------------------------------------------------------------------------------------------------------------------------------------------------------------------------------------------------------------------------------------------------------------|
| Basic               | Data preservation: opinion (-) | We've had to go in with a little help from them [people who left the lab] and it was ok, but it was hard—looking at every version which one had the most info                                                                                                         |
| Basic               | Data preservation: opinion (-) | Would see figure in PowerPoint presentation, but then had to find data behind the PowerPoint                                                                                                                                                                          |
| Basic               | Data preservation: opinion (-) | And I usually found there were multiple copies on multiple drives, sometimes slightly different versions                                                                                                                                                              |
| Basic               | Data preservation: opinion (-) | Info retrieval can be difficult though, can be clunky. It's dependent on my memory, knowing something was there                                                                                                                                                       |
| Basic               | Data preservation: opinion (-) | Often when a trainee leaves, u lose the info, even if they give u a hard drive, u don't know where it is                                                                                                                                                              |
| Clinical            | Data preservation: opinion (-) | Can't even plug in an external hard drive into the VA system                                                                                                                                                                                                          |
| Clinical            | Data preservation: opinion (-) | Data loss do occur, not often though, during the transfer for some unknown reason                                                                                                                                                                                     |
| Clinical            | Data preservation: opinion (-) | Right now she has a program that backs it up continuously, but they don't want to pay for that ("we have trial version, but I think we're not gonna buy it, think we're gonna do it manually")                                                                        |
| Clinical            | Data preservation: opinion (-) | On Dropbox ("I know we're not supposed to use Dropbox")                                                                                                                                                                                                               |
| Clinical            | Data preservation: opinion (-) | Exporting the data from REDCap, Qualtrics. Translation from survey to Excel. Issue for data cleaning & quality.                                                                                                                                                       |
| Basic               | Data preservation: opinion +   | There is a lot data on the server that may not be needed any more. But people always think they might come back to re-work on those data someday even though nobody really does.                                                                                      |
| Clinical/Pop Health | Data preservation: opinion +   | I would be happy to have anyone else manage it at any step of the way [laughing], but I would want to have some control over who uses it and how it's used                                                                                                            |
| Basic               | Data preservation: opinion +   | Want consistent parameters between images that are supposed to be compared together                                                                                                                                                                                   |
| Basic               | Data preservation: opinion +   | Micro array data is really managed by this consortium, so u can access the raw data and the processed data—that's a very accessible interface. That's also a very recent thing. There's probably a lot of microarray data that's nowhere near as standardized as this |
| Basic               | Data preservation: opinion +   | One of the strengths of that consortium is they standardized everything                                                                                                                                                                                               |
| Basic               | Data preservation: opinion +   | There may have been 20 different groups collecting data, but they were all using the same standards                                                                                                                                                                   |
| Basic               | Data reuse                     | As though we're going back and saying we can reanalyze so and so's data, but most of our experiments are directed towards a particular answer                                                                                                                         |
| Basic               | Data reuse                     | We might compare and see if the two results are compatible with each other.                                                                                                                                                                                           |
| Basic               | Data reuse                     | Almost every time when you're done, you have to go back to the original experiment                                                                                                                                                                                    |
| Basic               | Data reuse                     | Sometimes try, sometimes difficult—have to find the data—contact the person or figure out the formats—depends on how computer savvy someone is and how much time person is willing to spend with the data,                                                            |
| Basic               | Data reuse                     | Don't remember, but it may happen—if they had better data                                                                                                                                                                                                             |
| Basic               | Data reuse                     | Normally, no. Perhaps the reason is, particularly the measurements that come from animal cells, the control animals change—try to stay in the animal colony                                                                                                           |

|          |            |                                                                                                                                                                                                                                                                                                                                                                                                                                |
|----------|------------|--------------------------------------------------------------------------------------------------------------------------------------------------------------------------------------------------------------------------------------------------------------------------------------------------------------------------------------------------------------------------------------------------------------------------------|
| Basic    | Data reuse | I'd say 10 years is probably the longest that we've gone (in using data)                                                                                                                                                                                                                                                                                                                                                       |
| Basic    | Data reuse | Yes, go back and reuse old data                                                                                                                                                                                                                                                                                                                                                                                                |
| Basic    | Data reuse | Many of his projects are connected. Data re-use do occur.                                                                                                                                                                                                                                                                                                                                                                      |
| Basic    | Data reuse | Oh sure. As much as you can. But you have to say when you're doing it. For example: the first few papers that I put out, changes in the electrical patterns between two cells. There's the core of the paper, then a broader look in another paper. Some of these data are hard to come by and as much as we can get out of it we do. Might be the same neuron but looking at different aspects of what the experiment yields. |
| Basic    | Data reuse | Do you have difficulty using old data, determining what exactly was going on? All the time. A lot of this time we're running in place.                                                                                                                                                                                                                                                                                         |
| Basic    | Data reuse | We do revisit old data—we're getting a paper together now where we'll have to revisit an old dataset—we're seeing something very different so we're having to compare with old dataset                                                                                                                                                                                                                                         |
| Basic    | Data reuse | Yes. For example: Some research started 10 years ago, but he's still mining the data and publishing on it                                                                                                                                                                                                                                                                                                                      |
| Basic    | Data reuse | I just got a paper provisionally accepted that the research was done 6 years ago—resurrected this data, filled in the blanks that remained, and writing 2 papers on it—been sitting there, no one else had thought about doing this, so it's still ok                                                                                                                                                                          |
| Basic    | Data reuse | Yes we've reused our data a lot, using different materials, or different cell lines/stem cells                                                                                                                                                                                                                                                                                                                                 |
| Basic    | Data reuse | Not really                                                                                                                                                                                                                                                                                                                                                                                                                     |
| Clinical | Data reuse | It depends, most of the time u use it for some other sub-study or analysis                                                                                                                                                                                                                                                                                                                                                     |
| Clinical | Data reuse | He reuses a tremendous amount of data (his own, other peoples, other peoples in new ways )                                                                                                                                                                                                                                                                                                                                     |
| Clinical | Data reuse | All studies are considered extensions of each other, so they will go back and look at an older dataset, so nothing is put away for good.                                                                                                                                                                                                                                                                                       |
| Clinical | Data reuse | Have never used another person's data, doesn't know that they never would but never have.                                                                                                                                                                                                                                                                                                                                      |
| Clinical | Data reuse | Sure, oh yeah, all the time—longitudinal, knowledge is progressive, often go back to reexamine things                                                                                                                                                                                                                                                                                                                          |
| Clinical | Data reuse | Image—u have thousands of ways to interrogate an image                                                                                                                                                                                                                                                                                                                                                                         |
| Clinical | Data reuse | If we're using the same subjects we identify that we're doing that                                                                                                                                                                                                                                                                                                                                                             |
| Clinical | Data reuse | We'd go back. One grant I had, we're doing pet MRI. One thing we found is for both our researchers and radiologists, we needed to do a cognitive battery to confirm their cognitive status (needed the gold standard)                                                                                                                                                                                                          |
| Clinical | Data reuse | Yes, it just keeps growing!                                                                                                                                                                                                                                                                                                                                                                                                    |
| Clinical | Data reuse | n/a [she did not talk about past projects—all projects are currently active]                                                                                                                                                                                                                                                                                                                                                   |
| Clinical | Data reuse | Yes.                                                                                                                                                                                                                                                                                                                                                                                                                           |
| Clinical | Data reuse | The study of the impact of primary care resident physician training on patient weight loss was conducted a few years back, and now we have just finished a similar study with extended scope.                                                                                                                                                                                                                                  |

|                     |              |                                                                                                                                                                                                                                                                                                                                                                                |
|---------------------|--------------|--------------------------------------------------------------------------------------------------------------------------------------------------------------------------------------------------------------------------------------------------------------------------------------------------------------------------------------------------------------------------------|
| Clinical            | Data reuse   | She is aware of situations where data (both biological samples and accompanying data) has been reused. Reexamination of blood samples from colon cancer patients led to discoveries about mutations associate with the KRAS protein allows patients to be screened in advance of certain therapies.                                                                            |
| Clinical            | Data reuse   | I'll go back to data I've collected and analyze it for results. I might stratify it                                                                                                                                                                                                                                                                                            |
| Clinical            | Data reuse   | [Don't think so]                                                                                                                                                                                                                                                                                                                                                               |
| Clinical            | Data reuse   | "Don't generally use other peoples data mainly due to my limitations"                                                                                                                                                                                                                                                                                                          |
| Clinical            | Data reuse   | Data sets lifespan is long. Almost 12 years and still using the same sets.                                                                                                                                                                                                                                                                                                     |
| Clinical            | Data reuse   | He has on occasion                                                                                                                                                                                                                                                                                                                                                             |
| Clinical            | Data reuse   | I'll go back and use things, may take figure out of something I wrote 5 years ago to use as a background figure in a current paper                                                                                                                                                                                                                                             |
| Clinical/Pop Health | Data reuse   | When I reuse my own data that I've already bought, I have to write a new proposal, I can't just willy nilly do what I want with the data                                                                                                                                                                                                                                       |
| Clinical/Pop Health | Data reuse   | Have reused SAS programs as well                                                                                                                                                                                                                                                                                                                                               |
| Clinical/Pop Health | Data reuse   | Used some open source SAS programs from the web ("here's the SAS program for how to make a comorbidity index," for example)                                                                                                                                                                                                                                                    |
| Clinical/Pop Health | Data reuse   | Nothing is ever really done, everything's a work in progress—so I keep protocols open for a while                                                                                                                                                                                                                                                                              |
| Clinical/Pop Health | Data reuse   | In the future certainly, I haven't done it just because I haven't had time                                                                                                                                                                                                                                                                                                     |
| Clinical/Pop Health | Data reuse   | Whole bunch of external data from city and state, some we buy from commercial companies                                                                                                                                                                                                                                                                                        |
| Med Ed?             | Data reuse   | Yes absolutely, I think that's a core idea of the registry—this is data that u could answer a bunch of questions are—so one of our missions is to collaborate with other researchers                                                                                                                                                                                           |
| Statistics          | Data reuse   | Yes, there is sometimes more uses for the data—it's always a possibility, and frequently it happens. The one thing I have not gotten around to having a system for and work out is actually cataloging all of those already cataloged things ( <i>in the researchers personal directories</i> ).                                                                               |
| Basic               | Data sharing | Most often happens if we were collaborating. It happens reasonably often. Usually when collaborating, people don't need to see the raw data. The data gets processed into numbers, and usually they are satisfied to see the final numbers and images, and they are not asking to get down in the weeds and see all those data and reanalyze them. There's more trust in that. |
| Basic               | Data sharing | We've had 14 papers published by people we've never heard of—using our data                                                                                                                                                                                                                                                                                                    |
| Basic               | Data sharing | If somebody asked for our datasets, the most efficient way is to buy hard drives and send the hard drives—downloading through the Internet would be very, very long. Nobody knows any other solutions that would be faster that I know about                                                                                                                                   |

|       |              |                                                                                                                                                                                                                                                            |
|-------|--------------|------------------------------------------------------------------------------------------------------------------------------------------------------------------------------------------------------------------------------------------------------------|
| Basic | Data sharing | Mail hard drives                                                                                                                                                                                                                                           |
| Basic | Data sharing | Only share raw data with people on projects                                                                                                                                                                                                                |
| Basic | Data sharing | Outside the group, would only share information (preliminary results)                                                                                                                                                                                      |
| Basic | Data sharing | The files are analyzed, the results are there, there's a certain level of trust in the field that I don't need to go to the raw data, I believe that you did it right                                                                                      |
| Basic | Data sharing | The only time I have seen raw data being reviewed is during investigation of scientific fraud                                                                                                                                                              |
| Basic | Data sharing | Outside the group, I have never seen that, never inside my group or in anyone else's (if it's not part of a collaborative project)                                                                                                                         |
| Basic | Data sharing | I've had people come in who want to analyze data from 10 years ago, I've been able to dig out this stuff                                                                                                                                                   |
| Basic | Data sharing | No (other's people data)                                                                                                                                                                                                                                   |
| Basic | Data sharing | Already have an obligation to upload the genome sequence data. I think that's what the data share goal is more, large sets that you could look at in another way                                                                                           |
| Basic | Data sharing | We definitely do share in collaborative projects—project we do in collaboration with a group in Switzerland                                                                                                                                                |
| Basic | Data sharing | Share by have common access to a common server—share the platform using the same passcode                                                                                                                                                                  |
| Basic | Data sharing | We occasionally look at publicly available data, rare, but probably going to get more common                                                                                                                                                               |
| Basic | Data sharing | Researcher from any organization can go into database and see what has been observed for certain proteins                                                                                                                                                  |
| Basic | Data sharing | Data is open source, so is the data repository.                                                                                                                                                                                                            |
| Basic | Data sharing | Every project that he's involved in now, both the data and the software are open source. They encourage people in the field with publication to shall the data. They search literatures for data in interest and they contact the author for data sharing. |
| Basic | Data sharing | Yes. They have been using open source data, as mentioned before.                                                                                                                                                                                           |
| Basic | Data sharing | Yes, by email. These Excel files. There have been times when people wanted the raw files. So I've mailed a DVD. 95% it's pretty tight [the organization and structure of the data] and analyzed.                                                           |
| Basic | Data sharing | Want to know only medical center people could have access to the metadata                                                                                                                                                                                  |
| Basic | Data sharing | Yeah, all the time                                                                                                                                                                                                                                         |
| Basic | Data sharing | FDA—"What they want is pharmaceuticals to actually post failed clinical trials—so we could data mine enormously important data"                                                                                                                            |
| Basic | Data sharing | Drug that was shown to not work. "All I know is the paper that was published," it would be great to get access to the data                                                                                                                                 |

|          |              |                                                                                                                                                                                                                                                                                                                                                                                                                                      |
|----------|--------------|--------------------------------------------------------------------------------------------------------------------------------------------------------------------------------------------------------------------------------------------------------------------------------------------------------------------------------------------------------------------------------------------------------------------------------------|
| Basic    | Data sharing | She (a collaborator) gave us a list of data (not the raw data) but then we compare that to the previous data, so we've done comparisons that way. I just got an email from the foundation that supported the project—CHDI—they are in the process of trying to figure out the network of proteins that's related to this disease, so they asked me for this data so that they compare what they've done and put it in their network. |
| Basic    | Data sharing | I think my student and postdoc probably went through other people's data to compare with our data—that would be important to do for the publication                                                                                                                                                                                                                                                                                  |
| Basic    | Data sharing | But someone who wanted to do a rigorous comparison between our data and another group's data that did something similar. So her interest was to do a rigorous comparison to see what's in common and what's not                                                                                                                                                                                                                      |
| Basic    | Data sharing | GEO for gene expression data, not really anywhere else                                                                                                                                                                                                                                                                                                                                                                               |
| Clinical | Data sharing | Collaborations with other cohorts like ours, a lot of our work up to know, we have collaborated with a Swedish and an Italian cohort                                                                                                                                                                                                                                                                                                 |
| Clinical | Data sharing | Website of the cohort consortium. Share description of data, don't share actual data                                                                                                                                                                                                                                                                                                                                                 |
| Clinical | Data sharing | IRB data: they have done that many times—sometimes it's anonymized data, sometimes it's de-identified, it's specific to each project                                                                                                                                                                                                                                                                                                 |
| Clinical | Data sharing | Once the primary aim is done, and since NIH wants it, I think sharing is ok.                                                                                                                                                                                                                                                                                                                                                         |
| Clinical | Data sharing | People have requested theirs, and she provided de-identified dataset, which was easy for her to do—easy to find, de-identify, share, was transparent.                                                                                                                                                                                                                                                                                |
| Clinical | Data sharing | Yes sure. Typically its done through NIH-related mechanisms, data are de-identified, haven't put in repository yet but we've talked about it                                                                                                                                                                                                                                                                                         |
| Clinical | Data sharing | Typically what happens, someone writes an email, I have this project I'd like to do it with u, do u have these materials, this is our objective—it's not a blind sign up and just take it, we use our judgment                                                                                                                                                                                                                       |
| Clinical | Data sharing | Some of our investigators here are discussing having limited datasets available on a website                                                                                                                                                                                                                                                                                                                                         |
| Clinical | Data sharing | Each of the grants that we have at NIH has some sort of data sharing agreement                                                                                                                                                                                                                                                                                                                                                       |
| Clinical | Data sharing | Use other people data all the time—use FTP sites                                                                                                                                                                                                                                                                                                                                                                                     |
| Clinical | Data sharing | Got internal funding to add LPs to a subset—going to call the people who already participated in stuff and try to get LPs from them, until the money runs out.                                                                                                                                                                                                                                                                       |
| Clinical | Data sharing | Wants to really do it in a big way (informationist project—want to create anonymized data set) (I would like to take a subset of that data for those people who have a complete dataset, and anonymize it and create a publicly accessed database that you would need a password to enter—want to only have people who have complete data because other stuff won't be particularly valuable to the dataset—replica of his dataset   |
| Clinical | Data sharing | "Not too much, I guess in theory I could if we wanted to do a multi-site kind of thing."                                                                                                                                                                                                                                                                                                                                             |
| Clinical | Data sharing | No, not yet [related response in question 11]                                                                                                                                                                                                                                                                                                                                                                                        |



|                     |              |                                                                                                                                                                                                       |
|---------------------|--------------|-------------------------------------------------------------------------------------------------------------------------------------------------------------------------------------------------------|
| Clinical            | Data sharing | Most people ask me for the questionnaire, not many ask for the actual data, would have to get IRB and stuff                                                                                           |
| Clinical            | Data sharing | Did share data with PhD student                                                                                                                                                                       |
| Clinical            | Data sharing | I haven't used a lot of other peoples data                                                                                                                                                            |
| Clinical            | Data sharing | She has never personally shared data                                                                                                                                                                  |
| Clinical            | Data sharing | Physicians certainly share information verbally about their clinical experiences with different diseases and patient types.                                                                           |
| Clinical            | Data sharing | Yeah, it was for a paper, this guy did a journal club for our papers, and I sent the raw de-identified data.                                                                                          |
| Clinical            | Data sharing | There is an effort to try to make sure there are common elements that would allow greater uniformity of sharing—part of it is this notion that nephrologists don't get in the sandbox and play nicely |
| Clinical            | Data sharing | MEMO—team of investigators here and other institutions. Used a shared data set.                                                                                                                       |
| Clinical            | Data sharing | New center for stroke disparity. Common core.                                                                                                                                                         |
| Clinical            | Data sharing | Creating registry. To keep measure across studies. This is in development that the field is working on as a whole                                                                                     |
| Clinical            | Data sharing | Will check with fellow PIs to share data quality/data mgmt. procedures and training manuals.                                                                                                          |
| Clinical            | Data sharing | Usually just he has access to data, collaborators via email                                                                                                                                           |
| Clinical            | Data sharing | On rare occasion people have asked for raw data—it's usually not people distant, people I know                                                                                                        |
| Clinical            | Data sharing | People have asked me for grant drafts, for help with their own grants                                                                                                                                 |
| Clinical            | Data sharing | People have asked for methods sections, I've sent them those                                                                                                                                          |
| Clinical            | Data sharing | Might use data from a collaborator, not from some random person I don't know                                                                                                                          |
| Clinical/Pop Health | Data sharing | Don't share right now                                                                                                                                                                                 |
| Clinical/Pop Health | Data sharing | It's her data, she's not averse to sharing it, there's a lot that can be looked at that I'm not looking at, but I don't have any current plans to share                                               |
| Clinical/Pop Health | Data sharing | Would have to get the IRB to approve sharing, but then it would probably be just giving them a file, it's a small enough dataset that we could do that                                                |
| Clinical/Pop Health | Data sharing | There's a similar investigator doing a similar study, she's using that dataset. She contacted him, he just sent the file to her                                                                       |
| Clinical/Pop Health | Data sharing | She's done other research using large <i>institutional</i> datasets                                                                                                                                   |
| Clinical/Pop Health | Data sharing | Get an email from a student who wants to use it for x project                                                                                                                                         |
| Clinical/Pop Health | Data sharing | Share via email or upload onto something NYU had down at Washington, files 2.0 or something                                                                                                           |

|                     |                           |                                                                                                                                                                                                                                                                                                                          |
|---------------------|---------------------------|--------------------------------------------------------------------------------------------------------------------------------------------------------------------------------------------------------------------------------------------------------------------------------------------------------------------------|
| Clinical/Pop Health | Data sharing              | More of the sharing we do is of instruments and data collection tools                                                                                                                                                                                                                                                    |
| Clinical/Pop Health | Data sharing              | Most recent R01—using Admin data from DOE                                                                                                                                                                                                                                                                                |
| Med Ed?             | Data sharing              | Challenge has always been how to describe the data for other people who might be interested in it                                                                                                                                                                                                                        |
| Med Ed?             | Data sharing              | Sample size is generally small so would like to eventually collaborate with other institutions                                                                                                                                                                                                                           |
| Med Ed?             | Data sharing              | Explicitly want to make this data available                                                                                                                                                                                                                                                                              |
| Med Ed?             | Data sharing              | There are rules with the registry                                                                                                                                                                                                                                                                                        |
| Statistics          | Data sharing              | We don't generate data, we analyze data, it belongs to the person who generated it—they need permission to share. It's not too common that it's shared, often people say no, I don't want you to use my data                                                                                                             |
| Basic               | Data sharing: opinion (-) | Would never consider using someone else's data                                                                                                                                                                                                                                                                           |
| Basic               | Data sharing: opinion (-) | Often someone will ask the data—and so I say yes, I have the data, do u have someone to come get it? And usually it stops there                                                                                                                                                                                          |
| Basic               | Data sharing: opinion (-) | The thing with imaging is some parts of it are so specialized in terms of experimental design, it may be much less frequent that people will want to dig into dataset                                                                                                                                                    |
| Basic               | Data sharing: opinion (-) | Biggest issue may be how good were the antibodies, how reliable were the cells—[may not just trust other people's data]                                                                                                                                                                                                  |
| Basic               | Data sharing: opinion (-) | Ethical issue—genomic data can be used for people identifying purpose, so there are restrictions there.                                                                                                                                                                                                                  |
| Basic               | Data sharing: opinion (-) | The bigger problem is not sharing data. It is where to put the shared data. There was a place called Tranche. With the funding dried out, it slowly died.                                                                                                                                                                |
| Basic               | Data sharing: opinion (-) | Just this year (2014) people at Duke used it, published really fast in some crappy place, and then I was hurt by that                                                                                                                                                                                                    |
| Basic               | Data sharing: opinion (-) | Copied my experiment from what they saw in a poster, they had some engineers reengineer our device, and then beat us to the punch                                                                                                                                                                                        |
| Basic               | Data sharing: opinion (-) | “Who does it benefit publishing after it's published? People can read the paper if they care”                                                                                                                                                                                                                            |
| Basic               | Data sharing: opinion (-) | If people could get their hands on it, they didn't have to do all that work, they can just get the data and profit from that, so why am I motivated to do that, put in all the hard work and then someone else will just profit from it                                                                                  |
| Basic               | Data sharing: opinion (-) | May not want people to have direct access to that data, I want people to know it exists so they know to contact me if they're interested                                                                                                                                                                                 |
| Basic               | Data sharing: opinion (-) | The spreadsheet format is, the raw data can be depending on the algorithm used, I'm guessing it can generate different—be interpreted differently—so the spreadsheet might be different depending on what you use, so maybe people need the raw data, but most people can't use it because they don't have the software. |

|                     |                           |                                                                                                                                                                                                                                                                                                                                                                                  |
|---------------------|---------------------------|----------------------------------------------------------------------------------------------------------------------------------------------------------------------------------------------------------------------------------------------------------------------------------------------------------------------------------------------------------------------------------|
| Basic               | Data sharing: opinion (-) | They'd have to negotiate with the lab where we interpreted the data. It's not proprietary but they [the lab] did create it, so strictly speaking, for the raw data, they'd have to go to the material that came out of the machine. I suspect people don't want that, so we provide spreadsheets and I think we did provide it in the supplementary material [of the article].   |
| Basic               | Data sharing: opinion (-) | Raw data—a lot of it doesn't look very pretty, so you don't really want to put it out there                                                                                                                                                                                                                                                                                      |
| Clinical            | Data sharing: opinion (-) | It's challenging outside the institution—issues of who's using it, data quality issues                                                                                                                                                                                                                                                                                           |
| Clinical            | Data sharing: opinion (-) | We asked the VA for our set of 700 veterans in our study, this is in our consent form. We asked, "Can you give us utilization, inpatient, outpatient over a year after enrollment in the study?" So far all we've gotten is a very long text file.                                                                                                                               |
| Clinical            | Data sharing: opinion (-) | There may be legality/ownership issues with sharing data as it is "owned" by the sponsor.                                                                                                                                                                                                                                                                                        |
| Clinical            | Data sharing: opinion (-) | Qualitative data. I would hope the NIH wouldn't mandate that                                                                                                                                                                                                                                                                                                                     |
| Clinical            | Data sharing: opinion (-) | Here's the thing, you'll have data overload. How many people, if my data were available, someone could run a meta-analysis. I see a lot of utility to it. For this to work though, people need standardized instruments like NIH Toolbox. If people make their own tools it's not useful. I just don't think all data should be available forever unless it's linked and useful. |
| Clinical            | Data sharing: opinion (-) | Double-edged sword of the shared dataset—High quality statistician at employ but could not get access to the raw data                                                                                                                                                                                                                                                            |
| Clinical            | Data sharing: opinion (-) | But no, I won't share my data. My data is my proprietary data. I will share it with my collaborators, absolutely would not put it up somewhere                                                                                                                                                                                                                                   |
| Clinical/Pop Health | Data sharing: opinion (-) | Medicare data, there's no sharing protocol, u have to go and ask for it yourself.                                                                                                                                                                                                                                                                                                |
| Basic               | Data sharing: opinion +   | A lot of data the published is under-analyzed, only outsiders can realize that but it's true                                                                                                                                                                                                                                                                                     |
| Basic               | Data sharing: opinion +   | Also quality checks. Now it's almost impossible to communicate through figures in science—need images etc. U can go beyond that and provide compressed but organized datasets that u need to look into to decide if I'm right or wrong                                                                                                                                           |
| Basic               | Data sharing: opinion +   | People want control of their data—but there are benefits to sharing—get cited, like if you have a popular paper                                                                                                                                                                                                                                                                  |
| Basic               | Data sharing: opinion +   | It's a typical excuse that only the people who made the data can understand it, yes, true with cutting-edge science, but different levels, certain level can be used by others                                                                                                                                                                                                   |
| Basic               | Data sharing: opinion +   | Everybody can share data—u have to document it—this is what people are afraid of, including us—like I know this animal was a little sick—that's something that I just know when I look at the data, but this is also documentable                                                                                                                                                |
| Basic               | Data sharing: opinion +   | Ur scared someone analyzes your dataset and come to a different conclusion. But that will happen. And that's also free advertisement—people will reanalyze because it's controversial, and then add new data                                                                                                                                                                     |

|                     |                         |                                                                                                                                                                                                                                                                                                                           |
|---------------------|-------------------------|---------------------------------------------------------------------------------------------------------------------------------------------------------------------------------------------------------------------------------------------------------------------------------------------------------------------------|
| Basic               | Data sharing: opinion + | Proteomic data so far does not have this issue since it is not patient identifying. In the future if the proteomic data becomes better and finer,                                                                                                                                                                         |
| Basic               | Data sharing: opinion + | I understand the more u share, the more u have, it only makes fiscal and community sense                                                                                                                                                                                                                                  |
| Basic               | Data sharing: opinion + | Would be great to share if there was a movie on how to use this device or a doc file describing, but I would want some sort of check in—like people would say I'd like this info, and then I could give them a password, and then they could get it                                                                       |
| Basic               | Data sharing: opinion + | I'm all in on sharing, we have empty desks in the lab where we will train people for free on our technology, we don't wanna be on their papers, they can just come in a learn what they want to learn                                                                                                                     |
| Basic               | Data sharing: opinion + | I want strict regulations to make sure there isn't misconduct.                                                                                                                                                                                                                                                            |
| Basic               | Data sharing: opinion + | So do I feel threatened that people are using my data? Not really, we see so many different things, and make sense of heterogeneity.                                                                                                                                                                                      |
| Basic               | Data sharing: opinion + | I could see how published data might be useful. Like if we publish one image, but we have others related, that might be useful. But data that hasn't been published at all, I'm not sure if it'll be useful, and also u don't know if you'll ever come back to it, might want to use that data in the future              |
| Clinical            | Data sharing: opinion + | One major issue is women are volunteers and we're supposed to protect their identity—we are part of the CI cancer consortium—she's the chair of the secretariat—we meet once a year—this issue came up (making data public)—and it's a big concern for a lot of cohorts—need to guarantee the confidentiality of the data |
| Clinical            | Data sharing: opinion + | With more sharing, data dictionaries will become more important                                                                                                                                                                                                                                                           |
| Clinical            | Data sharing: opinion + | There are a number of large datasets that intrigue me, I was surprised a couple years ago, student came to me, said they had access to insurance dataset, wanted to look at mental health status and economic status—100s of thousands of records with all this financial data, wealth every year                         |
| Clinical            | Data sharing: opinion + | I wouldn't see in a problem sharing my data, I'm pretty junior, usually it's a fellow or a medical student who wants to do a project, and she advises the project, then publish together—it's a win win                                                                                                                   |
| Clinical            | Data sharing: opinion + | These two projects aren't about their health, so I'm in an area that is more lenient. Re: sharing                                                                                                                                                                                                                         |
| Clinical            | Data sharing: opinion + | For my own data, it doesn't matter to me, I can see where some people are opening themselves up to if they made any mistakes, but if I made a mistake someone should call me out on it.                                                                                                                                   |
| Clinical/Pop Health | Data sharing: opinion + | Nobody has ever asked                                                                                                                                                                                                                                                                                                     |
| Clinical/Pop Health | Data sharing: opinion + | If it's federally funded, it seems like the right thing to do to share                                                                                                                                                                                                                                                    |
| Statistics          | Data sharing: opinion + | They've spent a lot of time generating their data, they don't want other people publishing on it                                                                                                                                                                                                                          |
| Statistics          | Data sharing: opinion + | But now the thinking of young researchers has changed, and people think data should be shared and there's all these places to share it                                                                                                                                                                                    |

|          |           |                                                                                                                                         |
|----------|-----------|-----------------------------------------------------------------------------------------------------------------------------------------|
| Basic    | Data size | I would guess at this point, we could take all of our data and we would be talking tens of 100s of gigabytes                            |
| Basic    | Data size | 10 datasets all together                                                                                                                |
| Basic    | Data size | 30 images, each images is 1GB—generate 30GB in one day. For 1 paper=500 images and each image is 1.5GB ~ half a terabyte in one project |
| Basic    | Data size | Raw is 1GB, and then analyzed is 2GB                                                                                                    |
| Basic    | Data size | Images form the microscopy core—those are about 100MB per file, about 10–20 per project                                                 |
| Basic    | Data size | Patch-clamp data somewhere around the same (100MB per file)                                                                             |
| Basic    | Data size | They estimate probably 10 terabytes overall per year                                                                                    |
| Basic    | Data size | Each experiment might have several thousand, 10s of thousands of images                                                                 |
| Basic    | Data size | 10s of GBs per week in terms of just image data for people who are making a lot of 3D movies of lymph nodes or tissues                  |
| Basic    | Data size | Few terabytes a year                                                                                                                    |
| Basic    | Data size | Mass spectrometry—2–3GB                                                                                                                 |
| Basic    | Data size | In a project, analyze 95 tumors, 15 mass spec per tumor=very large datasets                                                             |
| Basic    | Data size | DNA and RNA sequencing—even larger                                                                                                      |
| Basic    | Data size | The size of the spreadsheets is small: in kilobytes                                                                                     |
| Basic    | Data size | 1–10 terabytes per person per year. Safe estimate of total stored now: 100 terabytes                                                    |
| Basic    | Data size | 16 terabytes                                                                                                                            |
| Basic    | Data size | Probably in the gigabytes range                                                                                                         |
| Basic    | Data size | I don't think it was that much (TB)                                                                                                     |
| Clinical | Data size | Health study—close to 100GB data (their 100GB drive is almost full)                                                                     |
| Clinical | Data size | MRI study—issue of space. Worked with IT—they provided us with a site or something that we could upload it                              |
| Clinical | Data size | Just HCUP is close to 100GB                                                                                                             |
| Clinical | Data size | Run 1–2 subjects/wk, SPSS datasets are small                                                                                            |
| Clinical | Data size | One folder w/300 gig and only 110 have been used so far                                                                                 |
| Clinical | Data size | Our data is probably in the 1–2 terabyte range                                                                                          |
| Clinical | Data size | But the actual size of files I have no idea                                                                                             |
| Clinical | Data size | Currently have 277 unique individuals, going to have 500.                                                                               |
| Clinical | Data size | Audio and video of screen capture are probably the biggest files (focus group is 1 hour 25 mins long /each)                             |
| Clinical | Data size | 25 interviews with providers and staff are 45 mins each                                                                                 |
| Clinical | Data size | Numbers are up in the 1,000s so nothing too big                                                                                         |
| Clinical | Data size | Eventually, we're going to have 500 gigabytes of videos                                                                                 |
| Clinical | Data size | 75 videos over 5 years...maybe 200 videos                                                                                               |

|                     |              |                                                                                                                                                                                                         |
|---------------------|--------------|---------------------------------------------------------------------------------------------------------------------------------------------------------------------------------------------------------|
| Clinical            | Data size    | 1 study 140, another 130, so databases are not huge                                                                                                                                                     |
| Clinical            | Data size    | Some are very small, up to a few MB                                                                                                                                                                     |
| Clinical/Pop Health | Data size    | Size, doesn't think she has the terabyte of data                                                                                                                                                        |
| Clinical/Pop Health | Data size    | 75,000 patients and every single Medicare claim for a year for them, so not small—and that's just one dataset                                                                                           |
| Clinical/Pop Health | Data size    | About 400 individuals                                                                                                                                                                                   |
| Clinical/Pop Health | Data size    | Ballpark on data size                                                                                                                                                                                   |
| Clinical/Pop Health | Data size    | 10,000 consumers and receipts—soda project is 8,000 so probable 12–15,000 over the last 5 years                                                                                                         |
| Clinical/Pop Health | Data size    | IRI data—in neighborhood of 1–2 terabytes                                                                                                                                                               |
| Med Ed?             | Data size    | Most of our datasets aren't so big, we can just sent them electronically                                                                                                                                |
| Statistics          | Data size    | Let's say maybe 2,000 variables for ultimately 400 subjects, right now we have 200 and something                                                                                                        |
| Basic               | Data storage | Large data (shared data): stored and processed in the data repository mentioned before.                                                                                                                 |
| Basic               | Data storage | The lab notebooks get stored in the lab. In the high shelves [because they are not often accessed?].                                                                                                    |
| Basic               | Data storage | Leave the data on the lab computers.                                                                                                                                                                    |
| Basic               | Data storage | We have our cluster that we created, which was very good because we weren't affected by the flooding                                                                                                    |
| Basic               | Data storage | We have various servers, and we have various hard drives in people's drawers                                                                                                                            |
| Basic               | Data storage | Put them in external hard drives—don't use cloud or anything like that                                                                                                                                  |
| Basic               | Data storage | Have a couple hard drives already not backed up that haven't been published                                                                                                                             |
| Basic               | Data storage | Patch-clamp—everything is contained within the computers that are generating it and on an external hard drive to make room for acquisition                                                              |
| Basic               | Data storage | Isn't on a central server because we don't have enough space to hold everything at one time. So we'll use the MCIT servers for what we're currently working on, and then when done, move data elsewhere |
| Basic               | Data storage | Kept on the CDs, DVDs, hard drives                                                                                                                                                                      |
| Basic               | Data storage | Stored on the super cluster                                                                                                                                                                             |
| Basic               | Data storage | Genomics data—stored on the cluster                                                                                                                                                                     |
| Basic               | Data storage | Various Macintosh hard drives                                                                                                                                                                           |
| Basic               | Data storage | Portable back up (external hard drive) that they pass around occasionally                                                                                                                               |
| Basic               | Data storage | Use Dropbox—"Dropbox is better than the server because you have that backup"                                                                                                                            |
| Basic               | Data storage | Use Google drive and Dropbox, although he knows you're not supposed to                                                                                                                                  |

|          |              |                                                                                                                                                                                        |
|----------|--------------|----------------------------------------------------------------------------------------------------------------------------------------------------------------------------------------|
| Basic    | Data storage | Google drive to share with himself and Dropbox to share with other people in the lab                                                                                                   |
| Basic    | Data storage | Long-term management of the data? We throw it on external backup.                                                                                                                      |
| Basic    | Data storage | Everyone has their own PC, laptop and external drive. [It's not clear to him if those PCs are backed up since Skirball IT is mostly Mac and he's PC]                                   |
| Basic    | Data storage | 2 big servers in our lab                                                                                                                                                               |
| Basic    | Data storage | Raw data is on big server in lab                                                                                                                                                       |
| Basic    | Data storage | Everyone has their own hard drive and that's backed up on the server there                                                                                                             |
| Basic    | Data storage | Dropbox                                                                                                                                                                                |
| Basic    | Data storage | Given 300GB as a lab on our remote server                                                                                                                                              |
| Basic    | Data storage | Mirror server—2 in different rooms, continuously backing up to each other, not in another location (on 6th floor, would have to melt the polar icecaps pretty bad to get up here)      |
| Basic    | Data storage | Raw data is on big server in lab                                                                                                                                                       |
| Basic    | Data storage | Going to host it locally                                                                                                                                                               |
| Basic    | Data storage | Shared drive                                                                                                                                                                           |
| Basic    | Data storage | Raw data is at Scripps                                                                                                                                                                 |
| Basic    | Data storage | Jeff has all the raw data.                                                                                                                                                             |
| Basic    | Data storage | It may be somewhere on our server, but that data wasn't a great set of data so we haven't gone back to look at it. It's on our lab computer, but backed up using the R or D drive.     |
| Basic    | Data storage | Everybody keeps their own images on their own computer or on the server, or some of it is on CDs and DVDs                                                                              |
| Basic    | Data storage | When we're putting together a paper or her team wants to show something to her, they'll put it on the lab server. Otherwise, usually people in her lab cant access other peoples data. |
| Basic    | Data storage | On the MCIT servers                                                                                                                                                                    |
| Basic    | Data storage | On CDs and DVDs                                                                                                                                                                        |
| Basic    | Data storage | GEO                                                                                                                                                                                    |
| Clinical | Data storage | We have a very extensive database that Yelena has organized that hold epidemiology data, tracked specimen use, and so on                                                               |
| Clinical | Data storage | In-house database for NYU health study—complex database—keep all sorts of data there                                                                                                   |
| Clinical | Data storage | Data in REDCap—talking to research IT to see if they have some software suitable for migration to their system                                                                         |
| Clinical | Data storage | Don't store anything on our own computers here, we share it on research IT                                                                                                             |
| Clinical | Data storage | Shared drive has 100GBs now, and we only have a couple left, not enough at this point                                                                                                  |
| Clinical | Data storage | RedCap                                                                                                                                                                                 |
| Clinical | Data storage | EDC that's maintained by Duke, or it's a commercial thing, they might just have a license, but it's at least housed at Duke.                                                           |
| Clinical | Data storage | CTMS database for some of the site information                                                                                                                                         |

|                     |              |                                                                                                                                                                                                          |
|---------------------|--------------|----------------------------------------------------------------------------------------------------------------------------------------------------------------------------------------------------------|
| Clinical            | Data storage | Prospective studies on MCIT sanctioned and supported servers                                                                                                                                             |
| Clinical            | Data storage | Recently bought an external hard drive for statistician                                                                                                                                                  |
| Clinical            | Data storage | Data is on shared drive P drive, automatically backed up, only certain people have access. Also have hard copy backup paper records, stored in a cabinet in the lab                                      |
| Clinical            | Data storage | Have 3 servers                                                                                                                                                                                           |
| Clinical            | Data storage | 2 out of the 5 (servers) are NYU, 3 are not because MCIT we've had issues with quality control and stability—it's resulted in losses, delays, misconceptions, so we ended up maintaining our own systems |
| Clinical            | Data storage | Right now, the data sits largely resides on our servers.                                                                                                                                                 |
| Clinical            | Data storage | Imaging data is on both our servers and also on the radiology servers.                                                                                                                                   |
| Clinical            | Data storage | The data is on a shared drive with his team, under his folder, and there's the data                                                                                                                      |
| Clinical            | Data storage | Because it's the VA and they are particular about their data, it all lives on the VA drives so we operate by VPN from here.                                                                              |
| Clinical            | Data storage | Paper survey data is kept in a locked filed cabinet in her office                                                                                                                                        |
| Clinical            | Data storage | The data on VA-related project has to be stored on the VA secure server                                                                                                                                  |
| Clinical            | Data storage | Anything that's not HIPAA compliance issue is on Dropbox                                                                                                                                                 |
| Clinical            | Data storage | Medical educational research data are in EduData Warehouse                                                                                                                                               |
| Clinical            | Data storage | EPIC—Medidata Rave (see above)                                                                                                                                                                           |
| Clinical            | Data storage | Stored remotely. Because I have NIH grants, I was able to set up our own terabytes of NYU storage—through research IT servers                                                                            |
| Clinical            | Data storage | Use PBWorks wiki                                                                                                                                                                                         |
| Clinical            | Data storage | All biospecimens are also stored by NI DDK, they contract out where it's actually stored                                                                                                                 |
| Clinical            | Data storage | NYU shared drive to keep the data sets.                                                                                                                                                                  |
| Clinical            | Data storage | Center for Health Behavior Change—shared drive                                                                                                                                                           |
| Clinical            | Data storage | He doesn't store the images. Images are on the PAC system                                                                                                                                                |
| Clinical            | Data storage | Stores on hospital supported options                                                                                                                                                                     |
| Clinical            | Data storage | Encrypted iron key provided by MCIT                                                                                                                                                                      |
| Clinical            | Data storage | On the H drive                                                                                                                                                                                           |
| Clinical            | Data storage | On R drive                                                                                                                                                                                               |
| Clinical            | Data storage | Data in Velos,                                                                                                                                                                                           |
| Clinical            | Data storage | Raw data in lab                                                                                                                                                                                          |
| Clinical            | Data storage | Industry sponsored studies sit somewhere else, on their own databases                                                                                                                                    |
| Clinical            | Data storage | I have a lot of it on my shared drive (on the MCIT Servers)                                                                                                                                              |
| Clinical            | Data storage | I also have a cloud (I use Dropbox—My husband got drop box so then I got it too)                                                                                                                         |
| Clinical/Pop Health | Data storage | Research IT now has it                                                                                                                                                                                   |



|                     |                           |                                                                                                                                                                        |
|---------------------|---------------------------|------------------------------------------------------------------------------------------------------------------------------------------------------------------------|
| Clinical/Pop Health | Data storage              | Hard drives or DVDs—for most of her past data                                                                                                                          |
| Clinical/Pop Health | Data storage              | Keep the raw data in REDCap                                                                                                                                            |
| Clinical/Pop Health | Data storage              | All data is stored on MCIT server                                                                                                                                      |
| Clinical/Pop Health | Data storage              | These external hard drives are stored in locked drawer in office                                                                                                       |
| Clinical/Pop Health | Data storage              | IRI is on external hard drive—with 2 back ups                                                                                                                          |
| Clinical/Pop Health | Data storage              | Everything else on shared drive                                                                                                                                        |
| Clinical/Pop Health | Data storage              | The NY BMI data—That data lives with some collaborators down at the square                                                                                             |
| Med Ed?             | Data storage              | Trying to use Redcap more consistently to store our datasets—love that we can create the data dictionaries, behind the firewall and all that                           |
| Med Ed?             | Data storage              | Have it all on multiple hard drives                                                                                                                                    |
| Med Ed?             | Data storage              | Have MCIT shared drive, try to make sure everything makes it to the shared drive                                                                                       |
| Med Ed?             | Data storage              | Keep raw data in REDCap                                                                                                                                                |
| Statistics          | Data storage              | Store the data on our personal computers                                                                                                                               |
| Statistics          | Data storage              | Data in different places—one in Pittsburgh, one at Stonybrook, another is at Columbia                                                                                  |
| Statistics          | Data storage              | Then analyze there because those data objects are quite large, too large for computer, and then results are stored there too (so raw, analysis, and storage on server) |
| Statistics          | Data storage              | Directory for junk—every so often they empty “junk” cuz no one knows what it is, very messy                                                                            |
| Statistics          | Data storage              | Maybe 70% of the time the data is small enough to fit on our laptops and that’s what we do (store the data on our personal computers)                                  |
| Statistics          | Data storage              | We use the server—we work with MCIT directly to get access to that server. It’s not personally her, she doesn’t lately have time to do data analysis                   |
| Basic               | Data storage: opinion (-) | Not enough space [laughed]—can’t even transfer files through it                                                                                                        |
| Basic               | Data storage: opinion (-) | Don’t use MCIT server at all                                                                                                                                           |
| Basic               | Data storage: opinion (-) | “A little bit awkward to work strictly from the server”                                                                                                                |
| Basic               | Data storage: opinion (-) | “Not the cloud storage generation yet”                                                                                                                                 |
| Basic               | Data storage: opinion (-) | Concern about having the power go out in New Jersey someplace and not being able to access the data                                                                    |
| Basic               | Data storage: opinion (-) | One of the main reason they don’t use server is they don’t trust the network, they want to have it locally                                                             |

|                     |                           |                                                                                                                                                                                                                                                                                                                                       |
|---------------------|---------------------------|---------------------------------------------------------------------------------------------------------------------------------------------------------------------------------------------------------------------------------------------------------------------------------------------------------------------------------------|
| Basic               | Data storage: opinion (-) | Problem with Dropbox is the confidentiality                                                                                                                                                                                                                                                                                           |
| Basic               | Data storage: opinion (-) | Need more storing space in accommodating more data. The current data repository is outgrowing its size.                                                                                                                                                                                                                               |
| Basic               | Data storage: opinion (-) | Know researchers have found the 300GB kinda constrictive                                                                                                                                                                                                                                                                              |
| Clinical            | Data storage: opinion (-) | Problem is getting access to the HPC—running a simple stat on his datasets with 6 million patients, crashes normal computers                                                                                                                                                                                                          |
| Clinical            | Data storage: opinion (-) | HCC data—We have this database but he doesn't even know where its sitting (it's all de-identified)                                                                                                                                                                                                                                    |
| Clinical            | Data storage: opinion (-) | Haven't been able to get enough space                                                                                                                                                                                                                                                                                                 |
| Clinical            | Data storage: opinion (-) | "Because they don't give us enough space to actually do anything. They give you about the size of that laptop."                                                                                                                                                                                                                       |
| Clinical            | Data storage: opinion (-) | The VPN is not ideal. If we had it on an NYU server—I'm not a tech person, so there is probably something you can do to put it in cloud, but there are definitely days when the VPN is slow or the login isn't working and it's an issue.                                                                                             |
| Clinical            | Data storage: opinion (-) | Can one come up with the ideal equal access for all but secure? The VA has its own issues about data. Bellevue is very particular about—can you download software on to your computer? Oh, this computer lets you do it, but this one doesn't. Halfway through our study, Bellevue upgraded our computers and suddenly nothing works. |
| Basic               | Data storage: opinion (-) | Real secure server storage is more expensive that these external things [hard drives]. Buying a terabyte server would be 100 dollars a week vs. just 100 dollars total for the external hard drive                                                                                                                                    |
| Clinical            | Data storage: opinion (-) | 3 are not because MCIT we've had issues with quality control and stability—it's resulted in losses, delays, misconceptions, so we ended up maintaining our own systems                                                                                                                                                                |
| Clinical            | Data storage: opinion (-) | Have to request access—and can get access to tools like SAS, etc., because VA has license                                                                                                                                                                                                                                             |
| Clinical            | Data storage: opinion (-) | Hard for VA to install software                                                                                                                                                                                                                                                                                                       |
| Clinical            | Data storage: opinion (-) | Takes an hour, hour and a half to upload each transcript to NVivo                                                                                                                                                                                                                                                                     |
| Clinical            | Data storage: opinion (-) | Some files stored on local driver are backed up every 10 minutes. But files cannot be edited at local server because the required software is not available here.                                                                                                                                                                     |
| Clinical/Pop Health | Data storage: opinion (-) | Price was absurd to order more storage from MCIT                                                                                                                                                                                                                                                                                      |
| Basic               | Data storage: opinion +   | "I think cloud would be a good solution. Having data on external hard drives, we would need a second hard drive to back up the first hard drive. Sometimes we back it up on the second hard drive, but they will both be stored in the same physical location"                                                                        |
| Basic               | Data storage: opinion +   | They try to avoid commercial software as much as possible. In the field, there's so much open source that they can use, usually they can avoid being licensed.                                                                                                                                                                        |
| Basic               | Data storage: opinion +   | "If it's free, I'd like to have a hundred terabytes"                                                                                                                                                                                                                                                                                  |
| Clinical            | Data storage: opinion +   | It would be nice if we had our own, it's secure, but I do all my storage                                                                                                                                                                                                                                                              |
| Basic               | Data tyoe                 | Visual data                                                                                                                                                                                                                                                                                                                           |

|       |           |                                                                                                             |
|-------|-----------|-------------------------------------------------------------------------------------------------------------|
| Basic | Data type | Gel electrophoresis                                                                                         |
| Basic | Data type | Quantitative images of the gel                                                                              |
| Basic | Data type | Quantified the amount of information intensity on the gel                                                   |
| Basic | Data type | Measurements from florescence or luminescence                                                               |
| Basic | Data type | Monitoring a reaction rate (as a function of time) or making a single measurement.                          |
| Basic | Data type | Quantitative PCR                                                                                            |
| Basic | Data type | A series of numbers after every cycle that we then reduce to a single number                                |
| Basic | Data type | Analyze them to get ratios; normalize the numbers; to see how mutations affect the function                 |
| Basic | Data type | Rate measurement and have lots of data points to fit to a line to get a reaction rate.                      |
| Basic | Data type | Collections of strains and plasmids and sequences that we keep                                              |
| Basic | Data type | Image information                                                                                           |
| Basic | Data type | 250, 500 channels, sometimes 1 hour sometimes 5 hours records                                               |
| Basic | Data type | Video information                                                                                           |
| Basic | Data type | Put fluorescent markers on proteins and find where they are in the cell                                     |
| Basic | Data type | Electrophysiology—measure electrical currents in the cell                                                   |
| Basic | Data type | Super resolution microscopy                                                                                 |
| Basic | Data type | Scanning ion-conductance microscopy                                                                         |
| Basic | Data type | Electron microscopy                                                                                         |
| Basic | Data type | Flouro and electro—get molecular and structural                                                             |
| Basic | Data type | Gene expression                                                                                             |
| Basic | Data type | Micro arrays                                                                                                |
| Basic | Data type | RNA sequencing                                                                                              |
| Basic | Data type | 3-dimensional image files                                                                                   |
| Basic | Data type | Data on which mouse came from which parents, and how long ago—there's a data tracking that goes along there |
| Basic | Data type | Catalog cytokine levels                                                                                     |
| Basic | Data type | Flow plots from harvested animals that tell you about cell types found                                      |
| Basic | Data type | Microscopy data                                                                                             |
| Basic | Data type | Genomics data                                                                                               |
| Basic | Data type | Identification of proteins and characterization of their post-translational modifications                   |
| Basic | Data type | Quantitation of proteins and peptides.                                                                      |
| Basic | Data type | Modeling proteomics experimental design                                                                     |
| Basic | Data type | Biomarker discovery and verification                                                                        |
| Basic | Data type | Mass spectrometry                                                                                           |
| Basic | Data type | Electrical recordings                                                                                       |

|          |           |                                                                                                                                        |
|----------|-----------|----------------------------------------------------------------------------------------------------------------------------------------|
| Basic    | Data type | Behavioral experiments                                                                                                                 |
| Basic    | Data type | Electrophysiological data                                                                                                              |
| Basic    | Data type | EPSP and spike train traces                                                                                                            |
| Basic    | Data type | Movies                                                                                                                                 |
| Basic    | Data type | Manuscript                                                                                                                             |
| Basic    | Data type | Matlab figures                                                                                                                         |
| Basic    | Data type | Scripts                                                                                                                                |
| Basic    | Data type | Host locally the tumor genome atlas                                                                                                    |
| Basic    | Data type | Gels                                                                                                                                   |
| Basic    | Data type | In vitro assays                                                                                                                        |
| Basic    | Data type | Test tubes                                                                                                                             |
| Basic    | Data type | Protein interactions                                                                                                                   |
| Basic    | Data type | Staining protein measurements                                                                                                          |
| Basic    | Data type | Gene transcription                                                                                                                     |
| Basic    | Data type | Proteomics                                                                                                                             |
| Basic    | Data type | Mass spectrometry                                                                                                                      |
| Basic    | Data type | Imaging                                                                                                                                |
| Basic    | Data type | Microscopy                                                                                                                             |
| Basic    | Data type | RNA sequencing                                                                                                                         |
| Basic    | Data type | Western blots                                                                                                                          |
| Basic    | Data type | Reverse transcription polymerase chain reaction                                                                                        |
| Clinical | Data type | Questionnaires                                                                                                                         |
| Clinical | Data type | MRI data                                                                                                                               |
| Clinical | Data type | Radiology data                                                                                                                         |
| Clinical | Data type | Baseline data (demographic data, data on history, dietary data, data on main cancer incidence, cardiovascular, data on medication use) |
| Clinical | Data type | Patient data                                                                                                                           |
| Clinical | Data type | Uses national, international data from previous trials—gets data from networking                                                       |
| Clinical | Data type | NHANES                                                                                                                                 |
| Clinical | Data type | HCUP                                                                                                                                   |
| Clinical | Data type | HHC data                                                                                                                               |
| Clinical | Data type | State registries                                                                                                                       |
| Clinical | Data type | MRI studies                                                                                                                            |
| Clinical | Data type | Blood draws                                                                                                                            |
| Clinical | Data type | Cognitive data                                                                                                                         |

|          |           |                                                                                                                                                                                 |
|----------|-----------|---------------------------------------------------------------------------------------------------------------------------------------------------------------------------------|
| Clinical | Data type | Intravenous glucose tests                                                                                                                                                       |
| Clinical | Data type | Wide range of types of clinical data                                                                                                                                            |
| Clinical | Data type | Physical                                                                                                                                                                        |
| Clinical | Data type | Psych                                                                                                                                                                           |
| Clinical | Data type | Neuro                                                                                                                                                                           |
| Clinical | Data type | Medical exams                                                                                                                                                                   |
| Clinical | Data type | Clinical labs                                                                                                                                                                   |
| Clinical | Data type | Archive of spinal fluid and blood drawn longitudinally on hundreds of people                                                                                                    |
| Clinical | Data type | CT scans                                                                                                                                                                        |
| Clinical | Data type | MRI scans                                                                                                                                                                       |
| Clinical | Data type | PET scans                                                                                                                                                                       |
| Clinical | Data type | Blood diagnostics                                                                                                                                                               |
| Clinical | Data type | Radioligands for pet imaging                                                                                                                                                    |
| Clinical | Data type | Inflammation and tao imaging                                                                                                                                                    |
| Clinical | Data type | Numbers (age, test performances)                                                                                                                                                |
| Clinical | Data type | Raw data (And our imaging data all sits as mostly raw)                                                                                                                          |
| Clinical | Data type | Processed data                                                                                                                                                                  |
| Clinical | Data type | Cross-sectional dataset, eventually it will probably be a bit more longitudinal (quasi longitudinal)                                                                            |
| Clinical | Data type | NY state—fall prevention demonstration project—get core measurement, but then also getting whole host of measurements that have to do with falls, that aren't in other projects |
| Clinical | Data type | Patient questionnaires                                                                                                                                                          |
| Clinical | Data type | Chart review data                                                                                                                                                               |
| Clinical | Data type | Saliva cotinine analysis                                                                                                                                                        |
| Clinical | Data type | Hospitalization data                                                                                                                                                            |
| Clinical | Data type | Exit interviews on 160 obese patients                                                                                                                                           |
| Clinical | Data type | Survey data                                                                                                                                                                     |
| Clinical | Data type | Chart abstraction                                                                                                                                                               |
| Clinical | Data type | 100s of pages of transcripts, from 25 patients                                                                                                                                  |
| Clinical | Data type | Staff surveys                                                                                                                                                                   |
| Clinical | Data type | Biochemistry/biological analysis                                                                                                                                                |
| Clinical | Data type | Bio samples, blood stool, and vaginal and rectal swabs                                                                                                                          |
| Clinical | Data type | Blood stool                                                                                                                                                                     |
| Clinical | Data type | Vaginal and rectal swabs                                                                                                                                                        |
| Clinical | Data type | Pre-trial medical history                                                                                                                                                       |
| Clinical | Data type | Every prescription and non-prescription drug the patient is taking                                                                                                              |

|                     |           |                                                                                                             |
|---------------------|-----------|-------------------------------------------------------------------------------------------------------------|
| Clinical            | Data type | Create a baseline profile of their health that can used to measure against as patient participates in trial |
| Clinical            | Data type | Adverse events                                                                                              |
| Clinical            | Data type | Lab results                                                                                                 |
| Clinical            | Data type | Tumor data                                                                                                  |
| Clinical            | Data type | Randomized trial data                                                                                       |
| Clinical            | Data type | Qualitative data                                                                                            |
| Clinical            | Data type | Video                                                                                                       |
| Clinical            | Data type | Ethnography data                                                                                            |
| Clinical            | Data type | Rich text                                                                                                   |
| Clinical            | Data type | Oh yeah, when I was in public health school, there was a big nexus data set that I used.                    |
| Clinical            | Data type | Case report forms                                                                                           |
| Clinical            | Data type | Psychosocial                                                                                                |
| Clinical            | Data type | Clinical                                                                                                    |
| Clinical            | Data type | Demographic                                                                                                 |
| Clinical            | Data type | Audiotape                                                                                                   |
| Clinical            | Data type | Survey                                                                                                      |
| Clinical            | Data type | Mostly MRIs—imaging data                                                                                    |
| Clinical            | Data type | Clinical data form clinical trials                                                                          |
| Clinical            | Data type | Flow cytometry                                                                                              |
| Clinical/Pop Health | Data type | Medicare claims data                                                                                        |
| Clinical/Pop Health | Data type | Health insurance claims data                                                                                |
| Clinical/Pop Health | Data type | HMO data (integrated health care system data)                                                               |
| Clinical/Pop Health | Data type | Audio recording or transcription                                                                            |
| Clinical/Pop Health | Data type | Survey                                                                                                      |
| Clinical/Pop Health | Data type | Paper                                                                                                       |
| Clinical/Pop Health | Data type | Data on prevalence                                                                                          |
| Clinical/Pop Health | Data type | Data on how screening tools perform                                                                         |

|                     |                       |                                                                                                                                                                                                                                                                                                                                               |
|---------------------|-----------------------|-----------------------------------------------------------------------------------------------------------------------------------------------------------------------------------------------------------------------------------------------------------------------------------------------------------------------------------------------|
| Clinical/Pop Health | Data type             | IRI data                                                                                                                                                                                                                                                                                                                                      |
| Clinical/Pop Health | Data type             | NYC fitness data                                                                                                                                                                                                                                                                                                                              |
| Clinical/Pop Health | Data type             | Data is at point of purchase                                                                                                                                                                                                                                                                                                                  |
| Clinical/Pop Health | Data type             | Influence of food env on BMI—that's all secondary data                                                                                                                                                                                                                                                                                        |
| Med Ed?             | Data type             | Medical school registry: 85–90% medical student provide consent to include their educational and performance data in a research registry. That includes baseline OSCE (Objective Structured Clinical Examination) performance, course grades, encounter logs, clinical skill OSCE, USMLE step clinical skills exam, graduation questionnaire. |
| Med Ed?             | Data type             | Residency research registry: >200 residents across 6 residency programs with 80–90% consent rates. Data includes clinical evaluation (faculty rating), annual OSCE performance, 360 degree data (patients, staff, peers assessments).                                                                                                         |
| Med Ed?             | Data type             | Quality data                                                                                                                                                                                                                                                                                                                                  |
| Med Ed?             | Data type             | Chart data                                                                                                                                                                                                                                                                                                                                    |
| Med Ed?             | Data type             | Survey data                                                                                                                                                                                                                                                                                                                                   |
| Med Ed?             | Data type             | OSCE data                                                                                                                                                                                                                                                                                                                                     |
| Statistics          | Data type             | Brain imaging data                                                                                                                                                                                                                                                                                                                            |
| Basic               | Desired data services | If the school was researching what's out there, finding the best things and making us aware of them, licensing and releasing them.                                                                                                                                                                                                            |
| Basic               | Desired data services | Would be very useful if we had some support and we had a resident curator or software guy—get all the old data together                                                                                                                                                                                                                       |
| Basic               | Desired data services | We'd like to come up with solutions to have access within this community (his specialty of research)—that alone is very difficult                                                                                                                                                                                                             |
| Basic               | Desired data services | Would be good to have a cloud, Amazon or something, and someone else will manage it. I don't want it to cost us to do it                                                                                                                                                                                                                      |
| Basic               | Desired data services | It would be very useful if we had some ,                                                                                                                                                                                                                                                                                                      |
| Basic               | Desired data services | Uploading data would require someone to be resident here, learn about our datasets, also know things we don't know. New resources could help, such as programmers—it's hard to communicate across levels, tell the postdocs, for the benefit of human kind, do these things                                                                   |
| Basic               | Desired data services | Could benefit from a few terabytes of storage                                                                                                                                                                                                                                                                                                 |
| Basic               | Desired data services | There's nothing that provides any sort of real structure to the information that's being stored                                                                                                                                                                                                                                               |
| Basic               | Desired data services | Always been an issue—where does data collected to the datacore go?                                                                                                                                                                                                                                                                            |
| Basic               | Desired data services | Something that would be interesting would be archiving all this stuff                                                                                                                                                                                                                                                                         |

|       |                       |                                                                                                                                                                                                                                                                                                                                                                                                                                                           |
|-------|-----------------------|-----------------------------------------------------------------------------------------------------------------------------------------------------------------------------------------------------------------------------------------------------------------------------------------------------------------------------------------------------------------------------------------------------------------------------------------------------------|
| Basic | Desired data services | Imaging dataset for microscopy—meta data in the files might contain a lot of data on parameters of images—a lot of little details—if that could be captured in a little table or a Word file or something and it didn't have to be structured, could be just a block of info, if that were available and entered by the people who were entering into database, maybe would not have to be so structured—field for a metadata table, up to the individual |
| Basic | Desired data services | And then maybe a movie or something that captures one output in terms of how u process the data and things                                                                                                                                                                                                                                                                                                                                                |
| Basic | Desired data services | For published data but then could also be useful for us to be able to access the organize data that wasn't published                                                                                                                                                                                                                                                                                                                                      |
| Basic | Desired data services | If there was a standard for that (organizing data), that would be really helpful when someone leaves the lab                                                                                                                                                                                                                                                                                                                                              |
| Basic | Desired data services | If there was a way to automatically upload from hard drive to server, have duplicate—kind of a gigantic Dropbox type system, that would be great                                                                                                                                                                                                                                                                                                          |
| Basic | Desired data services | Would be useful internally—if there were systems that could integrate data from any given platform, that would be fantastic, it's a fantasy                                                                                                                                                                                                                                                                                                               |
| Basic | Desired data services | Interested in some sort of service to help him estimate costs when putting together grant budget (and he brought it up again later)                                                                                                                                                                                                                                                                                                                       |
| Basic | Desired data services | Would like to be able to get a lot of public data and download it and reanalyze it, don't have the space right now.                                                                                                                                                                                                                                                                                                                                       |
| Basic | Desired data services | I'd love something else, such as what Theodora is talking about [re: MCIT storage]                                                                                                                                                                                                                                                                                                                                                                        |
| Basic | Desired data services | If there was a formal format, archival [procedure], data transparency, it would help a lot.                                                                                                                                                                                                                                                                                                                                                               |
| Basic | Desired data services | The other data management service I used here (library)                                                                                                                                                                                                                                                                                                                                                                                                   |
| Basic | Desired data services | What I want is that as a portal for my lab, for outsiders, to get a hold of the data. The ability to interface with that would be lovely. In principle, there are other things that are more scientific—computer speed, the ability to put simulations online or larger scale simulations run on the desktops.                                                                                                                                            |
| Basic | Desired data services | Keeping track of the old data. And the peripheral files, what's in the raw data, and some way to access or distribute the summary plots. My dream is that you can click on a figure and get the data                                                                                                                                                                                                                                                      |
| Basic | Desired data services | It's cyclical, once someone reaches their full stride, someone comes and takes them from you—there's a short window where they're actually really productive—because of that, it'd be nice to know here's a library of all the data—tell future generations where to go—I see the utility there                                                                                                                                                           |
| Basic | Desired data services | Data management is a really good one                                                                                                                                                                                                                                                                                                                                                                                                                      |
| Basic | Desired data services | My sense is that the technology evolves quickly. So this summer when they got more data, it was analyzed in a different way that it's a whole other story. It can't be a static entity that someone can go back and forth with. Partly b/c we work with this group that's at the cutting edge of analysis, who are constantly reinventing, it makes it hard to keep up                                                                                    |



|          |                       |                                                                                                                                                                                                                                                                                                                                                                                                                                                                                          |
|----------|-----------------------|------------------------------------------------------------------------------------------------------------------------------------------------------------------------------------------------------------------------------------------------------------------------------------------------------------------------------------------------------------------------------------------------------------------------------------------------------------------------------------------|
| Basic    | Desired data services | It would be useful for people in my lab if they were forced to label their data in a certain way and keep it in a certain place where it would be easier for others in the lab to get to and understand                                                                                                                                                                                                                                                                                  |
| Clinical | Desired data services | Would be nice if IT had a centralized database we could use                                                                                                                                                                                                                                                                                                                                                                                                                              |
| Clinical | Desired data services | What would make it better is a dedicated staff—consistent people who have the expertise—if there were just some statisticians, database programmers, in the hospital who u know have worked on these things                                                                                                                                                                                                                                                                              |
| Clinical | Desired data services | The most organized organizations he knows of have a panel of statisticians and database programmers—it makes it easier for them to get NIH grants                                                                                                                                                                                                                                                                                                                                        |
| Clinical | Desired data services | Institution wise—PubMed type thing for data (data catalog) would be extremely useful, I have no idea what the person next door is doing                                                                                                                                                                                                                                                                                                                                                  |
| Clinical | Desired data services | Having a central place to figure out who's doing what would be helpful, he doesn't know who's using HCUP                                                                                                                                                                                                                                                                                                                                                                                 |
| Clinical | Desired data services | If they were told there were products that could do more for them, they'd be interested but what they have is working fine for them, and they can do things very rapidly.                                                                                                                                                                                                                                                                                                                |
| Clinical | Desired data services | I'd like to improve the pipeline of getting clinical data streamed into medical records—would like better interface between data and records—as we're trying to increase patient flow, always come up against that                                                                                                                                                                                                                                                                       |
| Clinical | Desired data services | I'd like to have a pac system here, so we could directly connect to the imaging facility—very soon to start PET imaging at NYU (been off campus until now)—we'd like to have direct conduits that way                                                                                                                                                                                                                                                                                    |
| Clinical | Desired data services | Don't like the remoteness of his location—not great for collaboration—should be surrounded by buzz so you run into people—far away so that never happens                                                                                                                                                                                                                                                                                                                                 |
| Clinical | Desired data services | I would love to learn about available databases                                                                                                                                                                                                                                                                                                                                                                                                                                          |
| Clinical | Desired data services | PET scans—different types of scans in brain, different age groups, different procedures to create that scan, collect continuous data—difficult to get, very expensive—but the data do exist                                                                                                                                                                                                                                                                                              |
| Clinical | Desired data services | Large population studies—New York area, family histories                                                                                                                                                                                                                                                                                                                                                                                                                                 |
| Clinical | Desired data services | Anonymized data, one database doesn't talk to another database—if there was a neutral 3rd party that could connect the datasets into one dataset—state of New York—big problem with that is HIPAA                                                                                                                                                                                                                                                                                        |
| Clinical | Desired data services | Would love to be able to capture people in other ways, like spending habits—if could link voter registration database with database of who bought a car in the last year, that would be cool                                                                                                                                                                                                                                                                                             |
| Clinical | Desired data services | My vision is to have the master dataset that's mainly for internal purposes, that's for me and my direct collaborators. Secondly, I would like to take a subset of that data for those people who have a complete dataset, and anonymize it, and create a publicly accessed database that you would need a password to enter—want to only have people who have complete data because other stuff won't be particularly valuable to the dataset—replica of his dataset (not full replica) |

|                     |                       |                                                                                                                                                                                                                                                                                                           |
|---------------------|-----------------------|-----------------------------------------------------------------------------------------------------------------------------------------------------------------------------------------------------------------------------------------------------------------------------------------------------------|
| Clinical            | Desired data services | Thinking from the beginning, these are the data sources you're going to be collecting [to do the data model], what's the likely size of this dataset, what software to put this in? Where should this live?<br>Thinking from the beginning.                                                               |
| Clinical            | Desired data services | Not having enough people who understand the data enough to do the analysis                                                                                                                                                                                                                                |
| Clinical            | Desired data services | Better communication between everything and everyone (labs, pharmacies, etc.) would make her life easier. Politics and hierarchy can get in the way of this.                                                                                                                                              |
| Clinical            | Desired data services | It would be very useful to have all the data managed electronically. Each patient generates a big stack of paper, and the sicker the patient is, the bigger the stack—more tests, hospitalizations, etc.                                                                                                  |
| Clinical            | Desired data services | I have ATLAS.ti so I can login offsite—I don't know if it works going through onsite health? That's what we really want. That way, you can collaborate and code and merge everything. We need to establish something like that. Like any stats software. Like STATA, SPSS. But I'd like to promote STATA. |
| Clinical            | Desired data services | I'd like to be able to run my data remotely                                                                                                                                                                                                                                                               |
| Clinical            | Desired data services | Majority of studies less than 100 sample size—so there is an effort to dump the data into a larger database that would have more power                                                                                                                                                                    |
| Clinical            | Desired data services | Small pilot—have some money from CTSI, Leo has money—trying to put together cohort of children to show that we can do it—this will be my entre into the world of NYU as an independent data analysis, repository                                                                                          |
| Clinical            | Desired data services | More external training. Using SPSS, data mgmt. training for staff. Privacy & confidentiality. Standard trainings for staff.                                                                                                                                                                               |
| Clinical            | Desired data services | Data repository. Applied scientists with basic scientists, there's benefit for sharing datasets but the language and understanding needs to be understood.                                                                                                                                                |
| Clinical            | Desired data services | Making remote access more seamless [would be helpful]                                                                                                                                                                                                                                                     |
| Clinical/Pop Health | Desired data services | Having programmers we could call on who have experience in this type of data—that's departmental infrastructure more than anything                                                                                                                                                                        |
| Clinical/Pop Health | Desired data services | New tools—like Dedoose—she heard about it at a conference                                                                                                                                                                                                                                                 |
| Clinical/Pop Health | Desired data services | We spend a lot of time cleaning the data—this is this huge amount of work between collection and analysis—because I'm junior, I've always done that myself. In this project, it's completely bogging me down, and it would be done better and more efficiently if it was done by someone else             |
| Clinical/Pop Health | Desired data services | It would be great to have someone from the library have some help in thinking about evaluate a workflow for data and data management—I know u have a lot of experience in this                                                                                                                            |
| Clinical/Pop Health | Desired data services | Coordinating a storage plan—this comes up a lot                                                                                                                                                                                                                                                           |

|                     |                               |                                                                                                                                                                                                                                                                                                                                      |
|---------------------|-------------------------------|--------------------------------------------------------------------------------------------------------------------------------------------------------------------------------------------------------------------------------------------------------------------------------------------------------------------------------------|
| Clinical/Pop Health | Desired data services         | To have some thoughts and guidance and best practices for what would work best with the systems in place at NYU—in context of NYU what would be the best way to have these datasets managed and stored                                                                                                                               |
| Clinical/Pop Health | Desired data services         | Can never have too many programmers                                                                                                                                                                                                                                                                                                  |
| Clinical/Pop Health | Desired data services         | Just having access to a super computer, maybe through citrix or something so that I don't need to have this amazing computer, but I have access to processing power                                                                                                                                                                  |
| Med Ed?             | Desired data services         | We've often thought that what we need is a data manager. We don't really have one.                                                                                                                                                                                                                                                   |
| Statistics          | Desired data services         | Cataloging of their data, which is now organized in folders by researcher and then by project.                                                                                                                                                                                                                                       |
| Statistics          | Desired data services         | For example, if my colleagues' data was put somewhere in an organized way with minimal description as opposed to everyone keeping it on their laptops somewhere, it would be much better                                                                                                                                             |
| Statistics          | Desired data services         | Would include description of study, description of data files, description of how they're organized                                                                                                                                                                                                                                  |
| Basic               | Perception of data usefulness | People keep a lot of samples that they've prepared, but nobody's going to see these samples, there's not just an identity assigned to it, but also a concentration assigned to it in their lab notebook.                                                                                                                             |
| Basic               | Perception of data usefulness | The molecular bio stuff could probably be useful for the long time                                                                                                                                                                                                                                                                   |
| Basic               | Perception of data usefulness | Genome sequence data, people like to see the raw files, because you can come out with very different results—that's where raw data becomes useful.                                                                                                                                                                                   |
| Basic               | Perception of data usefulness | Data covers thousands of experiments performed around the world. Protein and peptide quantitation can be done to analyze/compare consistency.                                                                                                                                                                                        |
| Basic               | Perception of data usefulness | But in terms of keeping data in a box that people could get into, I think that fits poorly for the type of data that we're using—we've been burned by that sharing                                                                                                                                                                   |
| Basic               | Perception of data usefulness | My data is a little different because this is on the edge of technology, right on the edge of what's possible—we have these traces that are hard to follow—each comes with a story—there are a lot of shades of grey, it's not finite pieces of data—it's got flavors and nuances that may not be apparent to people looking at data |
| Basic               | Perception of data usefulness | So this disease is a genetic disease, and there are communities that want to develop treatment, so there's an effort to share this data and help investigators make sense and with people who are publishing. So there is that sense of wanting to share.                                                                            |
| Clinical            | Perception of data usefulness | Biospecimens are very valuable because they were collected before the disease, so they're good for looking at developing disease—we have a lot of them—I think it could be used for many years, I don't know—I don't think its limited—it's a unique source of data—we're one of the oldest cohorts                                  |
| Clinical            | Perception of data usefulness | From a scientific perspective, it's always useful for something, at least to generate a hypothesis                                                                                                                                                                                                                                   |
| Clinical            | Perception of data usefulness | Even transcript data can be used again, code again around a different question                                                                                                                                                                                                                                                       |
| Clinical            | Perception of data usefulness | The datasets have a lot of use over time.                                                                                                                                                                                                                                                                                            |
| Clinical/Pop Health | Perception of data usefulness | "This type of data, people do tend to go back to, even decades later"                                                                                                                                                                                                                                                                |
